## 1 **A way to break bones? The weight of intuitiveness**

2 D. Vettese<sup>1,2</sup> (Corresponding author), T. Stavrova<sup>1</sup>, A. Borel<sup>1,3</sup>, J. Marin<sup>1</sup>, M.-H. Moncel<sup>1</sup>, M. Arzarello<sup>2</sup>,  
3 C. Daujeard<sup>1</sup>.

4

5 <sup>1</sup>Histoire Naturelle de l'Homme Préhistorique (HNHP, UMR 7194), Sorbonne Universités, Muséum national d'Histoire  
6 naturelle (MNHN), Homme et Environnement, CNRS, Institut de Paléontologie Humaine, Paris, France

7 <sup>2</sup>Università degli Studi di Ferrara, Dipartimento degli Studi Umanistici, Sezione di Scienze Preistoriche e Antropologiche,  
8 Corso Ercole I d'Este 32, 44121 Ferrara, Italy

9 <sup>3</sup>Institute of Archaeological Sciences, Eötvös Loránd University, Múzeum krt. 4/b, 1088 Budapest, Hungary.

10

11 Delphine Vettese (corresponding author): [delphine.vettese@mnhn.fr](mailto:delphine.vettese@mnhn.fr), <https://orcid.org/0000-0001-6441-6054>

12 Trajanka Stavrova: [stavovatrajanka@gmail.com](mailto:stavovatrajanka@gmail.com)

13 Antony Borel: [antony.borel@mnhn.fr](mailto:antony.borel@mnhn.fr)

14 Juan Marin: [juan.marin.hernando@gmail.com](mailto:juan.marin.hernando@gmail.com), <http://orcid.org/0000-0002-5698-602X>

15 Marie-Hélène Moncel: [marie-helene.moncel@mnhn.fr](mailto:marie-helene.moncel@mnhn.fr)

16 Marta Arzarello: [marta.arzarello@unife.it](mailto:marta.arzarello@unife.it)

17 Camille Daujeard: [camille.daujeard@mnhn.fr](mailto:camille.daujeard@mnhn.fr), <https://orcid.org/0000-0001-7489-8691>

18

19 This paper was submitted to PCI Archaeology the April 1<sup>st</sup> 2020.

20

21 *Abstract:*

22         The essential relationship to fat in the Middle Paleolithic, and especially to the yellow  
23 marrow, explains the importance of addressing this issue of butchery cultural practices  
24 through the study of bone fracturing gestures and techniques. In view of the quasi-  
25 systematization of bone marrow extraction in many anthropized archaeological levels, this  
26 butchery activity had to be recurrent, standardized and counter-intuitive. Thus, the  
27 highlighting of butcher traditions made possible by the analysis of the distribution of  
28 percussion marks within fossil assemblages, in particular by opposition at patterns resulting  
29 from an intuitive practice. With this in mind, we carried out an experiment that focus on the  
30 intuitive way of fracturing bones to extract marrow, involving volunteers with no previous  
31 experience in this butchery activity. The objective of this experiment was to highlight the  
32 presence or absence of a distribution pattern for percussion marks in an intuitive context by  
33 comparing several long bones and individuals.

34         Thus, we wanted to evaluate the influence of the morphological specificity of the  
35 element and the specific characteristics of volunteers on the distribution of percussion marks  
36 during marrow extraction. Indeed, a previous study was able to show the possible existence of  
37 intuitive patterns of distribution of these traces according to the elements (Stavrova et al.  
38 2019). In addition, the comparison of the different behaviours of volunteers during bone  
39 fracturing with the production of remains and marks on bone surfaces highlighted the  
40 variables that most influence the creation of an intuitive model. We selected twelve from a  
41 larger experiment that resulted in the fracturing of more than 360 long bones. Each of the  
42 experimenters broke a series of ten long bones, always the same element. Subsequently, we  
43 compared the data collected during the experiment with the data from the laboratory study of  
44 the remains. Then, we applied an innovative GIS (Geographic Information System) method to  
45 analyze the distribution of percussion marks to highlight recurrent patterns.

46         One of the most significant results of our article shows the existence of significant concentrations of  
47 percussion marks, regardless of the volunteers' behaviour during bone fracturing. The predominance of  
48 two factors explains the distribution patterns that emerge from our analysis: for humerus, radio ulnas  
49 and tibias, the morphology of each element seems to constrain the location of percussion marks, while  
50 for femurs, individual choices have more weight in this distribution. In addition, we have observed  
51 that at different levels of our analyses, the bone response to fracturing may be totally opposite  
52 (quantity of bone marrow, marrow quality, number of blows, difficulty felt, number of fragments  
53 produced, type of marks registered), particularly regarding the results for radio-ulnas and tibias.  
54         Subsequently, it would be most interesting to compare the intuitive models that we were able to

55 highlight through spatial analysis with the distributions of percussion marks registered in fossil  
56 assemblages. It would thus be possible to propose new hypotheses on butchering practices based on  
57 the results presented in this work.

58 **Keywords:** GIS; bone breakage; experimental archaeology; intuitiveness; percussion marks;  
59 spatial analyses

60

## 61 **Introduction**

62 Lipids are essential nutrients for the human organism. During the Palaeolithic, fat was even  
63 more important, due to its role in the gluconeogenesis metabolism, synthesizing glucose from non-  
64 carbohydrate precursors (Costamagno and Rigaud, 2014; Holt et al., 2018; Speth, 2010). At that time,  
65 various flora and fauna provided lipid resources but their accessibility was largely influenced by  
66 environmental contexts. Lipids were found in oilseeds, such as hazelnuts. However, cold and dry  
67 periods were characterized by a low vegetal biomass during which animal resources represented the  
68 most important food resources (Benazzi et al., 2015; Binford, 1981; O'Connell et al., 1992; Speth,  
69 2010). The red marrow present in bone epiphyses and yellow marrow from the diaphysis were both  
70 important resources of fat from animal carcasses. Marrow was even the most widely available fat  
71 resource during the winter (Abe, 2005; Binford, 1978; Brugal and Defleur, 1989; Costamagno and  
72 David, 2009; Hardy et al., 2006; Kuntz et al., 2016; Speth and Spielman, 1983). Indeed, the recovery  
73 of yellow marrow was quasi-systematic among Palaeolithic hunter-gatherers, and particularly for  
74 Neanderthals (Noe-Nygaard, 1977; Patou-Mathis, 1985; Speth, 1989; Speth et al., 2012). Prehistorians  
75 noted widespread evidence of marrow extraction through long bone breakage at Middle Palaeolithic  
76 sites (e.g.,: Blasco and Fernández Peris, 2012; Daujeard et al., 2017, 2012; Joana et al., 2014; Marín et  
77 al., 2017; Romandini et al., 2014; Valensi et al., 2013).

78 The traces left on bones by marrow recovery are mainly percussion marks. For several  
79 decades, percussion marks and long bone breakage methods have been extensively studied (Boulestin,  
80 1999; Capaldo and Blumenschine, 1994; Fisher, 1995; Gifford-Gonzalez, 2018; Patou-Mathis, 1985;  
81 White, 1992. Since the beginning of the twentieth century and up until now, archaeological  
82 experiments on long bone breakage have been carried out to characterize percussion marks and their  
83 location (e.g.,: (Blasco et al., 2014; Blumenschine and Selvaggio, 1988; Brugal and Defleur, 1989;  
84 Galán et al., 2009; Martin, 1910; Moclán and Domínguez-Rodrigo, 2018; Noe-Nygaard, 1977; Patou-  
85 Mathis, 1985; Pickering and Egeland, 2006). Fracture patterns have also been extensively studied on  
86 different states of bone preservation: fresh, dry, weathered, fossilized but also heated, frozen, boiled  
87 (Alhaique, 1997; Karr and Outram, 2012; Lacroix, 2011; Outram, 2002; Villa and Mahieu, 1991). The  
88 authors based their experimental protocols on ethnographic works studying current populations of  
89 hunter-gatherers (e.g.,: Abe, 2005; Binford, 1981; Costamagno and David, 2009; Enloe, 1993; Oliver,  
90 1993; ; Stiner et al., 2011; Yravedra et al., 2017). More recently, the use of new methodological  
91 approaches (e.g., geometric morphometrics, 3D modelling or GIS analyses of distribution along the  
92 diaphysis...) presents new challenges for the experimental study of marrow recovery.

93 Some recent studies have focused on the distribution of percussion marks on long bones to  
94 approach the subsistence behaviours of past hominins (Blasco et al., 2013; Masset et al., 2016; Moclán  
95 and Domínguez-Rodrigo, 2018; Vettese et al., 2017). One of these studies highlighted for the first time  
96 a pattern of non-random bone breakage and interpreted it as a product of butchery traditions among

97 Neanderthals (Blasco et al., 2013). Through comparisons with an experiment performed by non-  
98 trained volunteers, the authors established that this systematic pattern differed from intuitive patterns.  
99 In addition, Moclan and colleagues (2018) proved that the morphology of the skeletal element from  
100 which marrow is extracted could influence the distribution of percussion marks.

101 We conducted a large-scale experiment to test how non-trained individuals recover marrow.  
102 Indeed, in order to identify butchery traditions in Palaeolithic sites, it is necessary to differentiate  
103 know-how from intuitiveness. The definition of a butchery tradition is a systematic and  
104 counterintuitive pattern shared by a same group. The immediate apprehension of the non-trained  
105 butcher to break a bone is influenced by numerous variables, including anatomical constraints (Blasco  
106 et al., 2013; Moclán and Domínguez-Rodrigo, 2018). Individuals who regularly break long bones  
107 acquire an empirical approach and develop specific skills that enhance efficiency (Pickering and  
108 Egeland, 2006). Hence, their skills include habits and preferences gained by experience and/or group  
109 traditions. This know-how cannot be assessed without differentiating between physical bone features  
110 and socio-cultural practices.

111 Thus, our aim is to experimentally test whether the inter-individual specificity of long bone  
112 morphology may have some influence on the distribution of percussion marks. Based on (GIS) spatial  
113 analysis of percussion marks on the bone surface, we also test the existence of a preferential pattern  
114 regarding the intuitive breakage of long bones. Moreover, we intend to verify whether non-  
115 experienced volunteers develop their own method to improve efficiency, such as an auto-learning  
116 process. Finally, it should be possible to grasp the influence of each bone structure by comparing the  
117 elements between them and by assessing the performance of individuals on the same types of bones.  
118 This allows for the comparison of behaviours and the influence of behaviour on the production of bone  
119 remains and the marks recorded.

120

## 121 ***Material and Methods***

### 122 **Material**

123 The studied sample includes 120 limb bones (humeri, radio-ulnas, femurs and tibias) from  
124 adult cows at least 24 months old. A slaughterhouse supplied this experimental series, with 30  
125 specimens of each element, both left and right (Table 1). Professional butchers defleshed the carcasses.  
126 During the process, they cut the metapodials with cutting pliers. Thus, these bones are absent from the  
127 present experiment. After the reception of the bones, they were stored for less than a week in a fridge  
128 at 4 °C. In addition, the elements broken by individuals 11 and 12 were frozen for 40 days and thawed  
129 for three days in the same fridge before the experiment (temperature: 4°C).

130

131

132 *Table 1: Data about the bone element broken by each experimenter (number of ID, element used, side). \* These bones were*  
133 *frozen.*

| Individual number | Element     | Right | Left |
|-------------------|-------------|-------|------|
| 1                 | Humerus     | 3     | 7    |
| 2                 | Radio-ulna  | 6     | 4    |
| 3                 | Femur       | 6     | 4    |
| 4                 | Tibia       | 2     | 8    |
| 5                 | Femur       | 4     | 6    |
| 6                 | Tibia       | 4     | 6    |
| 7                 | Humerus     | 5     | 5    |
| 8                 | Femur       | 6     | 4    |
| 9                 | Radio-ulna  | 6     | 4    |
| 10                | Tibia       | 3     | 7    |
| 11                | Humerus*    | 4     | 6    |
| 12                | Radio-ulna* | 3     | 7    |

134

135 The experimental series involved 12 volunteers (Table 2) without any experience in bone  
136 breakage: eight men (mean age =34 years old; SD = 11.1 years) and four women (mean age = 31 years  
137 old; SD = 7.1 years). Five individuals had theoretical knowledge of long bone anatomy and one  
138 (individual number 1) was used to flaking lithic tools. Each experimenter broke a series of 10 long  
139 bones of the same element. The number of tests is defined by the order in which each bone is broken  
140 one after the other in a series of 10. To avoid selection biases, the bones were stacked in a disordered  
141 pile when they were presented to the experimenters. Experimenters were isolated from each other so  
142 they could not observe how the others broke the bones. No demonstration was performed. Before the  
143 experiment, they only received one instruction: break the bone to extract the highest quantity and  
144 quality of yellow marrow suitable for consumption. The breakage activity lasted for two to three hours  
145 depending on the bone element and the individual. Experimenters had at their disposal a non-  
146 retouched quartzite hammerstone weighing about 2 kg, a limestone anvil, a plate to deposit the  
147 marrow and a wooden stick. The periosteum was not removed before breakage. Experimenters stopped  
148 once they had extracted as much bone marrow as they could, and then collected it in the plate and  
149 weighed it (Vettese 2020).

150

151

152

153

154

155

156

157 *Table 2: Data about the volunteers for each series (W: Women; M: Men; Stand. Dev.: Standard Deviation).*

| Individual number | Age  | Size (cm) | Weight (kg) | Sex | Used hand | Sport Practice | Bone knowledge | Broken bone element |
|-------------------|------|-----------|-------------|-----|-----------|----------------|----------------|---------------------|
| 1                 | 29   | 167       | 53          | W   | Right     | Yes            | Yes            | Humerus             |
| 2                 | 40   | 174       | 82          | M   | Right     | No             | Yes            | Radio-ulna          |
| 3                 | 25   | 185       | 78          | M   | Right     | Yes            | Yes            | Femur               |
| 4                 | 30   | 186       | 80          | M   | Right     | Yes            | No             | Tibia               |
| 5                 | 51   | 160       | 59          | W   | Left      | No             | Yes            | Femur               |
| 6                 | 22   | 190       | 95          | M   | Left      | Yes            | No             | Tibia               |
| 7                 | 39   | 169       | 63          | M   | Right     | Yes            | No             | Humerus             |
| 8                 | 23   | 182       | 95          | M   | Right     | No             | Yes            | Femur               |
| 9                 | 23   | 167       | 58          | W   | Right     | Yes            | No             | Radio-ulna          |
| 10                | 46   | 169       | 74          | M   | Right     | Yes            | No             | Tibia               |
| 11                | 25   | 158       | 73          | W   | Right     | Yes            | No             | Humerus             |
| 12                | 29   | 178       | 80          | M   | Right     | Yes            | No             | Radio-ulna          |
| Average           | 31.8 | 173.8     | 74.2        |     |           |                |                |                     |
| Stand. dev.       | 9.8  | 10.4      | 13.7        |     |           |                |                |                     |
| Maximum           | 51   | 190       | 95          |     |           |                |                |                     |
| Minimum           | 22   | 158       | 53          |     |           |                |                |                     |

158

159 Our experiment involved volunteers with no empirical knowledge of recovering marrow using  
160 long bone breakage. Some were archaeologists or palaeontologists, the rest of the experimenters  
161 worked in other fields with no relation to skeletal anatomy or bone tissue properties. The first category  
162 of experimenters were familiar with bone morphology and structure as a study object only. Thus, the  
163 approach to the long bones during marrow recovery was as intuitive as possible, independently of the  
164 experimenters' age or sex. Besides, the volunteers broke a series of ten bones one after another. This  
165 process allowed novice experimenters to self-assess and eventually learn from their mistakes.

166 After breakage, all the fragmented remains were grouped together in a bag with an  
167 identification code. The bones were boiled during 2 or 3 hours, to remove the grease and to soften the  
168 flesh, and then placed in an oven at 40°C in a solution of water and Papain (papaya enzyme) for 48  
169 hours. Then, they were soaked in a solution of water and sodium perborate for 24 hours, before being  
170 air-dried. The material is currently kept in the Institut de Paléontologie Humaine (Paris).

171

## 172 **Data acquisition**

173 During the experiments, an observer recorded the following variables: the series number,  
174 element laterality, position of the individual, the way the hammerstone was grasped, the position of the  
175 bone, the use of the anvil and the number and location of blows. For these latter, we defined an area as

176 a long bone portion associated with a side (Figure 1). In order to evaluate the progression of volunteers  
177 during the experiment, from the first try to the end of the operation, we recorded task difficulty  
178 evaluation and the number of blows. We asked the experimenters to auto-evaluate the difficulty  
179 encountered during marrow recovery on a scale from 1 to 5, (1 = very easy; 5= very hard), considering  
180 mainly the opening of the medullary cavity and marrow extraction. This auto-evaluation resulted in an  
181 empirical comparison between long bones. The aim of this auto-evaluation was to assess whether  
182 volunteers progressed and developed an efficient method to extract marrow or if tiredness along with  
183 the long period of effort affected their capabilities. For quality control purposes, the experimenter and  
184 observer evaluated results on a scale from 1 to 5, 1 referring to contaminated marrow containing  
185 abundant splinters and 5 being very clean marrow.

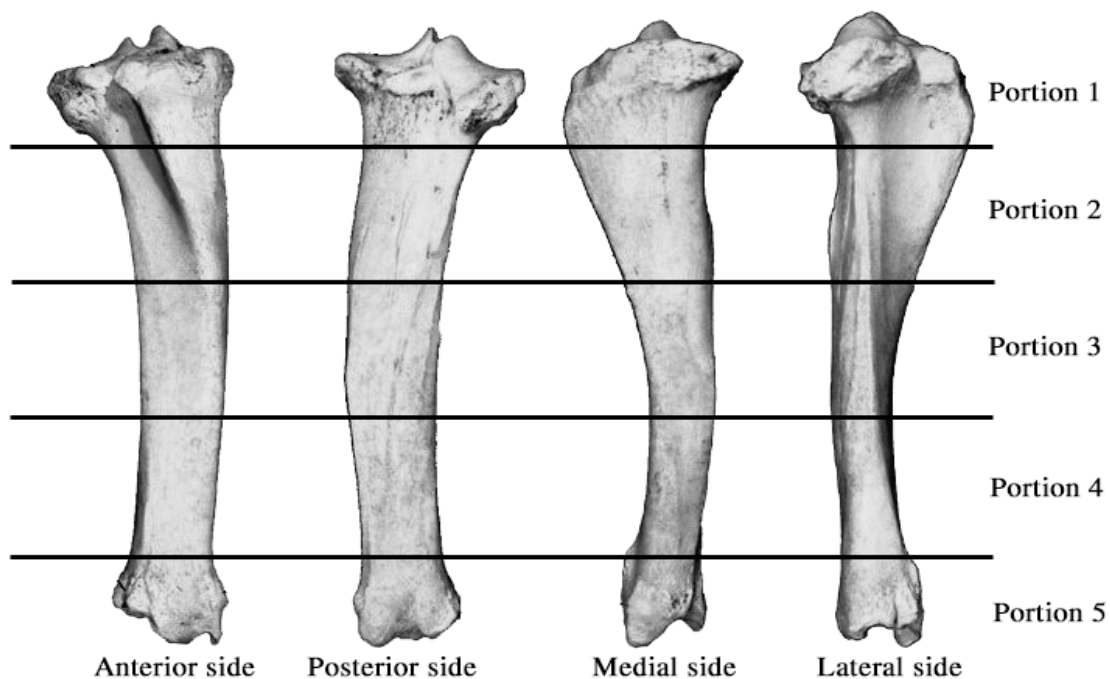

186

187 *Figure 1: Bone areas by portions and sides. Portion 1 (p1): proximal articular end; Portion 2 (p2): proximal diaphysis;*  
188 *Portion 3 (p3): medial diaphysis; Portion 4 (p4): distal diaphysis; Portion 5 (p5): distal articular end and Anterior (a),*  
189 *Posterior (p), Medial (m) and Lateral (l) side (after the drawing by Castel (2010), reference A. Grunwald - © 2016*  
190 *<https://allisongrunwald.wordpress.com/>).*

191

192 The number of identified specimens (NISP), the number of undetermined specimens (NUSP)  
193 and the total number of specimens (NSP) were recorded. As the exact location of the percussion marks  
194 is necessary, only identified fragments for each bone element were included. Besides, throughout the  
195 treatment and the study of each bone, all the remains of one element were kept together, but the NUSP  
196 were splinters that we could not refit. Remains that could not be refitted were not considered in the  
197 following analysis. The width and length of fragments were measured using a digital caliper. The  
198 location of the percussion marks on the bone fragments was analysed according to the GIS protocol



199 developed by Stavrova et al. (2019). The outline of the cortical surface of each identified fragment was  
200 digitized using georeferenced photographic images representing the four-sided visualization of each  
201 bone as a base.

202 Bone surface modifications were identified and recorded with the naked eye and 15-20x lens.  
203 The centre of each percussion mark was recorded in ArcGIS with a point symbol, based on the  
204 anatomical landmarks of each bone (e.g.,: foramen, crest) (Stavrova et al. 2019). In accordance with  
205 the terminology of Vettese et al. (submitted), five types of percussion marks were recorded: adhering  
206 flakes, crushing marks, flakes, percussion notches, ovoid or triangular percussion pits and grooves.  
207 The number of percussion marks (NPM) and the marks related to percussion (i.e., striations,  
208 microstriations and pseudo-notches) were also noted. These last marks were not taken into account in  
209 the total number of percussion marks. In addition, we excluded the flake because if we had taken into  
210 account the flake and the notch, which were respectively positive and negative for the same percussion  
211 mark, we would have counted the percussion point twice. In this analysis, percussion marks were  
212 divided into two groups: 1) crushing marks, notches and adhering flakes (called “CNA”) and 2) pits  
213 and grooves (called “Pits”). The “CNA” grouped the percussion marks related to cracking and  
214 fractures whereas “Pits” were only produced by incipient percussion or the rebound effect.

215 Distances between percussion marks were calculated in ArcGIS and the “Optimized Hot Spot  
216 analysis” tool was used to evaluate and highlight zones with high concentrations of percussion marks.  
217 This tool identifies statistically significant spatial clusters of high concentrations (hot spots) and low  
218 concentration of percussion marks (cold spots). The number of percussion marks recorded for each  
219 series complies with the minimum of 30 features required to conduct the analysis (Stavrova et al.  
220 2019).

221 The data collected during the experiment were compared to the data analysed in the laboratory  
222 in order to understand which variables of the experimenters’ behaviour could influence fragmentation  
223 and the production of percussion marks. Spearman’s rho was used to test the correlation between the  
224 data collected during the experiment (i.e., number of blows and marrow weight) and the data recorded  
225 on the bones after treatment (i.e., number of remains and number of percussion marks). Moreover, in  
226 order to evaluate auto-learning and individual improvement, we tested the Spearman correlation of the  
227 number of attempts according to the number of blows for each individual. We presented  $\rho$  of  
228 Spearman. To highlight the evolution of the number of blows between the beginning and end of the  
229 experiment for each of the volunteers, we compared, on the one hand, the two averages of the first  
230 three and the last three trials and, on the other hand, the first five and the last five trials using a non-  
231 parametric Mann-Whitney U test. Indeed, the t-test hypothesis was never respected for our data (i.e.,  
232 the normality and equivalence of the variance of data). We propose an Efficiency Index calculated by  
233 dividing the mass of marrow extracted from each bone by the number of blows. This Efficiency Index

234 represents the relationship between a form of expended energy and a form of recovered energy. The  
235 higher the Efficiency Index, the more marrow was extracted with the least number of blows. To test a  
236 possible evolution of the Efficiency Index between the three first and the last three tries and also  
237 between the five first and the last five attempts, we compared the two averages using the Mann-  
238 Whitney U Test, when assumptions for the t-test were not respected. We used the chi-squared test for  
239 the scale of auto-assessment. As Cochran's rule was not respected, we used the Fisher exact test to  
240 check the independence between the scale of marrow quality of the different elements. The correlation  
241 coefficients and the tests were computed using R software (R Core Team, 2019). We use an alpha of  
242 0.05 for all the tests.

243

## 244 **Results**

### 245 **Data recorded during the experiment**

246 Bone and individual positions: different ways to break a bone

247 The position of the bone elements and the position of the volunteers themselves varied during  
248 the breaking process (Table 3). Five different positions chosen by the experimenters were observed.  
249 The majority chose the squatting position (45%), followed by the kneeling position (43%). The  
250 standing position was rarely selected. Only one individual broke bones in a seated cross-legged  
251 position (individual n°2). A minority of the experimenters adjusted their positions during breakage  
252 (five individuals: n°2, 4, 8, 9 and 11; 42%). Individual n°7 remained in the squatting position during  
253 the entire experiment, but nonetheless tried the standing position once at the eighth try, without  
254 repeating it. Volunteer n°10 was the only one who did not adopt and maintain a position. By contrast,  
255 four experimenters developed some kind of habit after a certain number of attempts. Individual n°3,  
256 after three tries, chose the seated position and individual n°6 selected a kneeling position after two  
257 tries. Volunteer n°5 developed a routine from the sixth attempt onwards. For each attempt, she started  
258 in a standing position, then kneeled down, and she finished in a squatting position. Individual n°1  
259 squatted for all the attempts and half the time, she stood to hit the bone on the anvil. Only one  
260 volunteer tested almost all the positions during the experiment (individual n°12). Nonetheless, after  
261 two tries, he switched back to a squatting or kneeling position.

262 Regarding the choice of hand to grasp the hammerstone, only one individual used the left  
263 hand, although two volunteers were left-handed and one was ambidextrous. Therefore, the use of both  
264 hands did not seem to be dependent on laterality. All the volunteers breaking the radio-ulna used both  
265 hands at least once to grasp the pebble, which was never the case for the volunteers who broke the  
266 tibias. The individuals who used both hands were both men and women.

267 We distinguished five ways to position the long bone in order to open its medullar (Table 3).  
 268 Ten of the volunteers used the anvil at least once. Two experimenters (individuals n°8 and n°11) did  
 269 not use the anvil at all, but positioned the bones directly on the ground. One individual (individual  
 270 n°7) selected the batting technique. He hit the bone directly on the anvil with his hands grasping each  
 271 epiphysis in order to separate portion 1 from the diaphysis. Then, he laid the largest fragment on the  
 272 anvil and pursued breakage using the pebble to recover as much marrow as possible. He began using  
 273 this mixed technique after two tries and repeated it for the next attempts until the end of the series. He  
 274 judged this mixed technique more efficient than only the hammerstone on anvil technique. One-third  
 275 (33%) of the volunteers always positioned their bones in the same way during the experiment.  
 276 Therefore, the majority of the experimenters varied bone position during each try. We noticed that  
 277 volunteers experienced some difficulties in stabilizing the bone in order to hit it, especially for the  
 278 radio-ulnas. Sometimes the bone slipped and the blow was less efficient. Some experimenters used an  
 279 extra stone, their knees or the anvil to block the bone and keep it from slipping.

280 *Table 3: Experimenter and bone position for each bone element, percentages were performed by 30 attempts by elements,*  
 281 *and by the 120 attempts for the total.*

|                      | Squatting position | Standing position | Seated position | Two knees position | One kneel position | Right grasp hand | Left grasp hand | Both grasp hand | On the anvil | One side on the anvil | Batting | On anvil and ground | On the ground |
|----------------------|--------------------|-------------------|-----------------|--------------------|--------------------|------------------|-----------------|-----------------|--------------|-----------------------|---------|---------------------|---------------|
| <b>Femur</b>         | 7 23.3%            | 4 13.3%           | 10 33.3%        | 13 43.3%           | 2 6.7%             | 20 66.7%         | 0 0%            | 12 40%          | 18 60%       | 0 0%                  | 0 0%    | 1 3.3%              | 16 53.3%      |
| 3                    |                    |                   | 10              | 3                  | 2                  | 10               |                 | 2               | 10           |                       |         |                     |               |
| 5                    | 6                  | 4                 |                 |                    |                    |                  |                 | 10              | 8            |                       |         | 1                   | 6             |
| 8                    | 1                  |                   |                 | 10                 |                    | 10               |                 |                 |              |                       |         |                     | 10            |
| <b>Humérus</b>       | 20 66.7%           | 1 3.3%            | 3 10%           | 8 26.7%            | 0 0%               | 30 100%          | 0 0%            | 9 30%           | 20 66.7%     | 3 10%                 | 9 30%   | 0 0%                | 10 33.3%      |
| 1                    | 9                  | 1                 | 2               |                    |                    | 10               |                 |                 | 10           |                       |         |                     |               |
| 7                    | 10                 |                   |                 |                    |                    | 10               |                 | 8               | 10           | 3                     | 9       |                     |               |
| 11                   | 1                  |                   | 1               | 8                  |                    | 10               |                 | 1               |              |                       |         |                     | 10            |
| <b>Radio-Ulna</b>    | 16 53.3%           | 0 0%              | 11 36.7%        | 5 16.7%            | 3 10%              | 23 76.7%         | 0 0%            | 13 43.3%        | 16 53.3%     | 0 0%                  | 0 0%    | 14 46.7%            | 10 33.3%      |
| 2                    |                    |                   | 10              |                    |                    | 10               |                 | 2               | 10           |                       |         |                     |               |
| 9                    | 10                 |                   |                 |                    |                    | 3                |                 | 10              | 1            |                       |         | 5                   | 10            |
| 12                   | 6                  |                   | 1               | 5                  | 3                  | 10               |                 | 1               | 5            |                       |         | 9                   |               |
| <b>Tibia</b>         | 20 66.7%           | 0 0%              | 0 0%            | 10 33.3%           | 6 20%              | 20 66.7%         | 10 33.3%        | 0 0%            | 26 86.7%     | 2 6.7%                | 0 0%    | 11 36.7%            | 0 0%          |
| 4                    | 10                 |                   |                 |                    |                    | 10               |                 |                 | 10           | 2                     |         |                     |               |
| 6                    |                    |                   |                 | 10                 |                    |                  | 10              |                 | 10           |                       |         | 1                   |               |
| 10                   | 10                 |                   |                 |                    | 6                  | 10               |                 |                 | 6            |                       |         | 10                  |               |
| <b>Total général</b> | 63 52.5%           | 5 4.2%            | 24 20%          | 36 30%             | 11 9.2%            | 93 77.5%         | 10 8.3%         | 34 28.3%        | 80 66.7%     | 5 4.2%                | 9 7.5%  | 26 21.7%            | 36 30.0%      |

282

### 283 The marrow quantity and quality

284 In order to extract marrow after breakage, most of the volunteers used the wooden stick we  
 285 provided, but some preferred selecting their own. Only one individual (n°7) used the bone splinters  
 286 created during breakage. Some also used their fingers. The radio-ulna was the long bone that yielded  
 287 the smallest quantity of marrow; it represents 13% of the total collected marrow (Table 4). The  
 288 quantity of marrow extracted from the femur is twice as high (26%). The volunteers who broke the  
 289 humeri and the tibias extracted a slightly higher quantity of marrow (around 30%). The total quantity  
 290 of yellow marrow recovered represented 18 kg. We did not notice high variation among volunteers,

291 except for individual n°5 who recovered a significantly smaller quantity of marrow from the femurs  
 292 than the other experimenters for the femur series (Supplementary Information 1, 2, 3 and 4).

293

294

295 *Table 4: Individual number (n°indiv), Marrow Weight (MW), Number of Specimen (NSP), Number of identified specimens*  
 296 *(NISP), Number of undetermined specimens (NUSP), Number of blows (NB), Number of percussion marks (NPM), Number of*  
 297 *pit (Npit) and Number of crushing marks, of adhering flakes and of notches (NCNA).*

| Element           | N°indiv      | MW (g)       |               | NSP         |               | NISP        |               | NUSP        |               | NB          |               | NPM         |               | Npit        |               | NCNA       |               |
|-------------------|--------------|--------------|---------------|-------------|---------------|-------------|---------------|-------------|---------------|-------------|---------------|-------------|---------------|-------------|---------------|------------|---------------|
| Femur             | 3            | 1861         | 10.20%        | 259         | 9.50%         | 130         | 9.30%         | 129         | 9.80%         | 641         | 10.30%        | 263         | 5.30%         | 190         | 4.80%         | 73         | 7.40%         |
| Femur             | 5            | 1030         | 5.60%         | 202         | 7.40%         | 137         | 9.80%         | 65          | 4.90%         | 496         | 7.90%         | 326         | 6.50%         | 282         | 7.10%         | 44         | 4.40%         |
| Femur             | 8            | 1780         | 9.80%         | 222         | 8.20%         | 113         | 8.10%         | 109         | 8.20%         | 179         | 2.90%         | 221         | 4.40%         | 165         | 4.10%         | 56         | 5.70%         |
| <b>Femur</b>      | <b>Total</b> | <b>4671</b>  | <b>25.60%</b> | <b>683</b>  | <b>25.10%</b> | <b>380</b>  | <b>27.10%</b> | <b>303</b>  | <b>22.90%</b> | <b>1316</b> | <b>21.10%</b> | <b>810</b>  | <b>16.20%</b> | <b>637</b>  | <b>15.90%</b> | <b>173</b> | <b>17.50%</b> |
| Humerus           | 1            | 1710         | 9.40%         | 290         | 10.70%        | 109         | 7.80%         | 181         | 13.70%        | 573         | 9.20%         | 194         | 3.90%         | 72          | 1.80%         | 122        | 12.30%        |
| Humerus           | 7            | 1737         | 9.50%         | 131         | 4.80%         | 77          | 5.50%         | 54          | 4.10%         | 244         | 3.90%         | 304         | 6.10%         | 217         | 5.40%         | 87         | 8.80%         |
| Humerus           | 11           | 1941         | 10.60%        | 195         | 7.20%         | 84          | 6.00%         | 111         | 8.40%         | 377         | 6.00%         | 367         | 7.40%         | 301         | 7.50%         | 66         | 6.70%         |
| <b>Humerus</b>    | <b>Total</b> | <b>5388</b>  | <b>29.50%</b> | <b>616</b>  | <b>22.60%</b> | <b>270</b>  | <b>19.30%</b> | <b>346</b>  | <b>26.20%</b> | <b>1194</b> | <b>19.10%</b> | <b>865</b>  | <b>17.30%</b> | <b>590</b>  | <b>14.80%</b> | <b>275</b> | <b>27.80%</b> |
| Radio-ulna        | 2            | 799          | 4.40%         | 263         | 9.70%         | 119         | 8.50%         | 144         | 10.90%        | 808         | 12.90%        | 180         | 3.60%         | 49          | 1.20%         | 131        | 13.20%        |
| Radio-ulna        | 9            | 775          | 4.20%         | 113         | 4.20%         | 80          | 5.70%         | 33          | 2.50%         | 873         | 14.00%        | 503         | 10.10%        | 428         | 10.70%        | 75         | 7.60%         |
| Radio-ulna        | 12           | 811          | 4.40%         | 189         | 6.90%         | 73          | 5.20%         | 116         | 8.80%         | 822         | 13.20%        | 942         | 18.90%        | 894         | 22.40%        | 48         | 4.80%         |
| <b>Radio-ulna</b> | <b>Total</b> | <b>2385</b>  | <b>13.10%</b> | <b>565</b>  | <b>20.80%</b> | <b>272</b>  | <b>19.40%</b> | <b>293</b>  | <b>22.20%</b> | <b>2503</b> | <b>40.10%</b> | <b>1625</b> | <b>32.60%</b> | <b>1371</b> | <b>34.30%</b> | <b>254</b> | <b>25.70%</b> |
| Tibia             | 4            | 1755         | 9.60%         | 439         | 16.10%        | 192         | 13.70%        | 247         | 18.70%        | 285         | 4.60%         | 280         | 5.60%         | 138         | 3.50%         | 144        | 14.50%        |
| Tibia             | 6            | 1759         | 9.60%         | 175         | 6.40%         | 120         | 8.60%         | 55          | 4.20%         | 753         | 12.10%        | 738         | 14.80%        | 673         | 16.80%        | 65         | 6.60%         |
| Tibia             | 10           | 2290         | 12.50%        | 244         | 9.00%         | 166         | 11.90%        | 78          | 5.90%         | 189         | 3.00%         | 669         | 13.40%        | 590         | 14.80%        | 79         | 8.00%         |
| <b>Tibia</b>      | <b>Total</b> | <b>5804</b>  | <b>31.80%</b> | <b>858</b>  | <b>31.50%</b> | <b>478</b>  | <b>34.10%</b> | <b>380</b>  | <b>28.70%</b> | <b>1227</b> | <b>19.70%</b> | <b>1687</b> | <b>33.80%</b> | <b>1401</b> | <b>35.00%</b> | <b>288</b> | <b>29.10%</b> |
|                   | <b>Total</b> | <b>18248</b> |               | <b>2722</b> |               | <b>1400</b> |               | <b>1322</b> |               | <b>6240</b> |               | <b>4987</b> |               | <b>3999</b> |               | <b>990</b> |               |

298

299 The evaluation of the quality of collected marrow shows a low proportion of bad or very bad  
 300 assessments (10 %) (Table 5). In addition, most of those who made this judgment broke radio-ulnas.  
 301 Most (2/3) of the recovered marrow was evaluated as good or very good to consume. None of the  
 302 volunteers who broke the humerus series evaluated the marrow as very consumable. However, more  
 303 than a half of the volunteers estimated the tibia marrow to be very good. The Fisher exact tests show  
 304 that the scales of the tested elements were independent (df = 12, p<0.05).

305 We noted a significant negative correlation between the quantity of marrow and the number of  
 306 blows. Indeed, the radio-ulna was the element that received the most blows during the experiment and  
 307 where a smaller quantity of marrow was recovered. Concerning the radio-ulna, we observed a  
 308 significant negative correlation between the NISP and the quantity of marrow collected. Besides, we  
 309 noticed a significant positive correlation between the quantity of recovered marrow and both the  
 310 NUSP and the number of CNA.

311

312

313

314  
315  
316  
317

318 *Table 5: Scales of difficulty felt during the experiment and of the marrow quality auto-evaluated by the experimenters*  
319 *themselves for all the elements and for each one.*

| <b>Felt scale</b>           | <b>All</b> |       | <b>Femur</b> |       | <b>Humerus</b> |       | <b>Radio-ulna</b> |       | <b>Tibia</b> |       |
|-----------------------------|------------|-------|--------------|-------|----------------|-------|-------------------|-------|--------------|-------|
| <b>Very easy</b>            | 14         | 11.7% | 4            | 13.3% | 2              | 6.7%  | 1                 | 3.3%  | 7            | 23.3% |
| <b>Easy</b>                 | 53         | 44.2% | 11           | 36.7% | 21             | 70%   | 5                 | 16.7% | 16           | 53.3% |
| <b>Moderate</b>             | 28         | 23.3% | 9            | 30%   | 4              | 13.3% | 11                | 36.7% | 4            | 13.3% |
| <b>Hard</b>                 | 16         | 13.3% | 4            | 13.3% | 1              | 3.3%  | 8                 | 26.7% | 3            | 10%   |
| <b>Very hard</b>            | 9          | 7.5%  | 2            | 6.7%  | 2              | 6.7%  | 5                 | 16.7% | 0            | 0%    |
| <b>Marrow quality scale</b> | <b>All</b> |       | <b>Femur</b> |       | <b>Humerus</b> |       | <b>Radio-ulna</b> |       | <b>Tibia</b> |       |
| <b>Very bad</b>             | 3          | 2.5%  | 0            | 0%    | 3              | 10%   | 0                 | 0%    | 0            | 0.0%  |
| <b>Bad</b>                  | 9          | 7.5%  | 1            | 3.3%  | 0              | 0%    | 8                 | 26.7% | 0            | 0.0%  |
| <b>Neutral</b>              | 29         | 24.2% | 7            | 23%   | 15             | 50%   | 6                 | 20%   | 1            | 3.3%  |
| <b>Good</b>                 | 55         | 45.8% | 17           | 56.7% | 12             | 40%   | 14                | 46.7% | 12           | 40%   |
| <b>Very good</b>            | 24         | 20%   | 5            | 16.7% | 0              | 0%    | 2                 | 6.7%  | 17           | 57%   |

320

321 The level of difficulty experienced during the experiment and the number of blows

322 In summary, the experimenters found the activity very easy 14 times, easy 53 times, moderate  
323 28 times, difficult 16 times and very difficult only 9 times. Volunteers who broke the humeri did not  
324 encounter any difficulty in most cases (77% easy or very easy). The radio-ulna seems to be more  
325 difficult to break (43% hard or very hard and 37% moderate). None of the volunteers who broke a tibia  
326 estimated the task to be very difficult. They did not find the task any easier or harder as they  
327 progressed. In other words, they did not find the task harder at the beginning because they did not  
328 know how to go about it and then easier because they found an efficient technique. Likewise,  
329 exhaustion from the activity did not influence whether volunteers experienced more difficulty at the  
330 end of the breakage series (Table 5). The difficulty encountered according to the bone element varied  
331 significantly (Chi-squared test:  $df = 12$ ,  $X^2 = 73.00362$ ,  $p < 0.01$ ).

332 The results of Spearman's correlation analysis between the number of attempts according to  
333 the number of blows for each individual completed these observations. For five individuals  
334 (individuals n°1 and n°7 (humerus), individual n°3 (femur) and (individuals n°6 and n°9 (tibia)), the

335 correlation analysis shows a significant negative relationship (Spearman's rank correlation coefficient  
336 results respectively  $\rho = -0.81; -0.77; -0.73; -0.93; -0.69$ ). Regarding the other individual series, the  
337 results were not significant (Spearman's rank correlation coefficient results respectively  $\rho: n^{\circ}2 = -0.29;$   
338  $n^{\circ}4 = 0.54; n^{\circ}5 = -0.2; n^{\circ}8 = 0.51; n^{\circ}10 = 0.41; n^{\circ}11 = -0.44; n^{\circ}12 = 0.32$ ).

339 The results of Spearman's correlation analysis between the number of attempts according to  
340 the number of blows for each individual completed these observations. For five individuals  
341 (individuals  $n^{\circ}1$  and  $n^{\circ}7$  (humerus), individual  $n^{\circ}3$  (femur) and (individuals  $n^{\circ}6$  and  $n^{\circ}9$  (tibia)), the  
342 correlation analysis shows a significant negative relationship (Spearman's rank correlation coefficient  
343 results respectively  $\rho = -0.81; -0.77; -0.73; -0.93; -0.69$ ). Regarding the other individual series, the  
344 results were not significant (Spearman's rank correlation coefficient results respectively  $\rho: n^{\circ}2 = -0.29;$   
345  $n^{\circ}4 = 0.54; n^{\circ}5 = -0.2; n^{\circ}8 = 0.51; n^{\circ}10 = 0.41; n^{\circ}11 = -0.44; n^{\circ}12 = 0.32$ ).

346 The proportion of the number of blows varied over the last attempts depending on individuals.  
347 Experimenters  $n^{\circ} 1, 3, 7, 9$  reduced their number of hits by half, on average,  $n^{\circ}6$  by six between the  
348 three first attempts and the last three (Supplementary Information 1). Volunteer  $n^{\circ}12$  increased the  
349 average number of blows after the three first tries. However, if we consider the same individual  
350 breaking the same element during the whole experiment, we did not observe a significant difference  
351 between the five first and the last five attempts. We found similar results between the three first and  
352 the last three, except for the humerus ( $p$ -value = 0.0254) (Supplementary Information 2).

353 The bi-plots showing the number of blows and marrow weight did not display any linearity in  
354 the data regarding each element (Supplementary Information 3). When we examine bone element type,  
355 the volunteers who broke the radio-ulnas reveal reduced Efficiency Index compared to the other  
356 elements (Figure 2; EFI all). On the other hand, the experimenters who broke the tibias had a high  
357 average Efficient Index ( $>5$ ). There was marked variation between the volunteers who broke the  
358 humeri and the femurs, especially for the first three attempts (Figure 2; EFI 3). Between the first three  
359 and the last seven tries, the EFI of the volunteers who broke the tibias varied, like individual  $n^{\circ}8$ . At  
360 the individual level, two-thirds of the volunteers increased their EFI between the first five and last five  
361 tries ( $n^{\circ}3, 5, 1, 7, 11, 9, 6, 10$ ). Similarly, more than half the individuals augmented their EFI between  
362 the first and last three ( $n^{\circ}3, 1, 7, 11, 2, 9, 6$ ) (Supplementary Information 5). However, regarding all  
363 the experimenters, the Wilcoxon signed rank test did not show a significant difference between the first  
364 five and the last five tries or between the first three and the last three tries ( $p < 0.05$ ) (Supplementary  
365 Information 6). We observed similar results regarding each element ( $p < 0.05$ ).

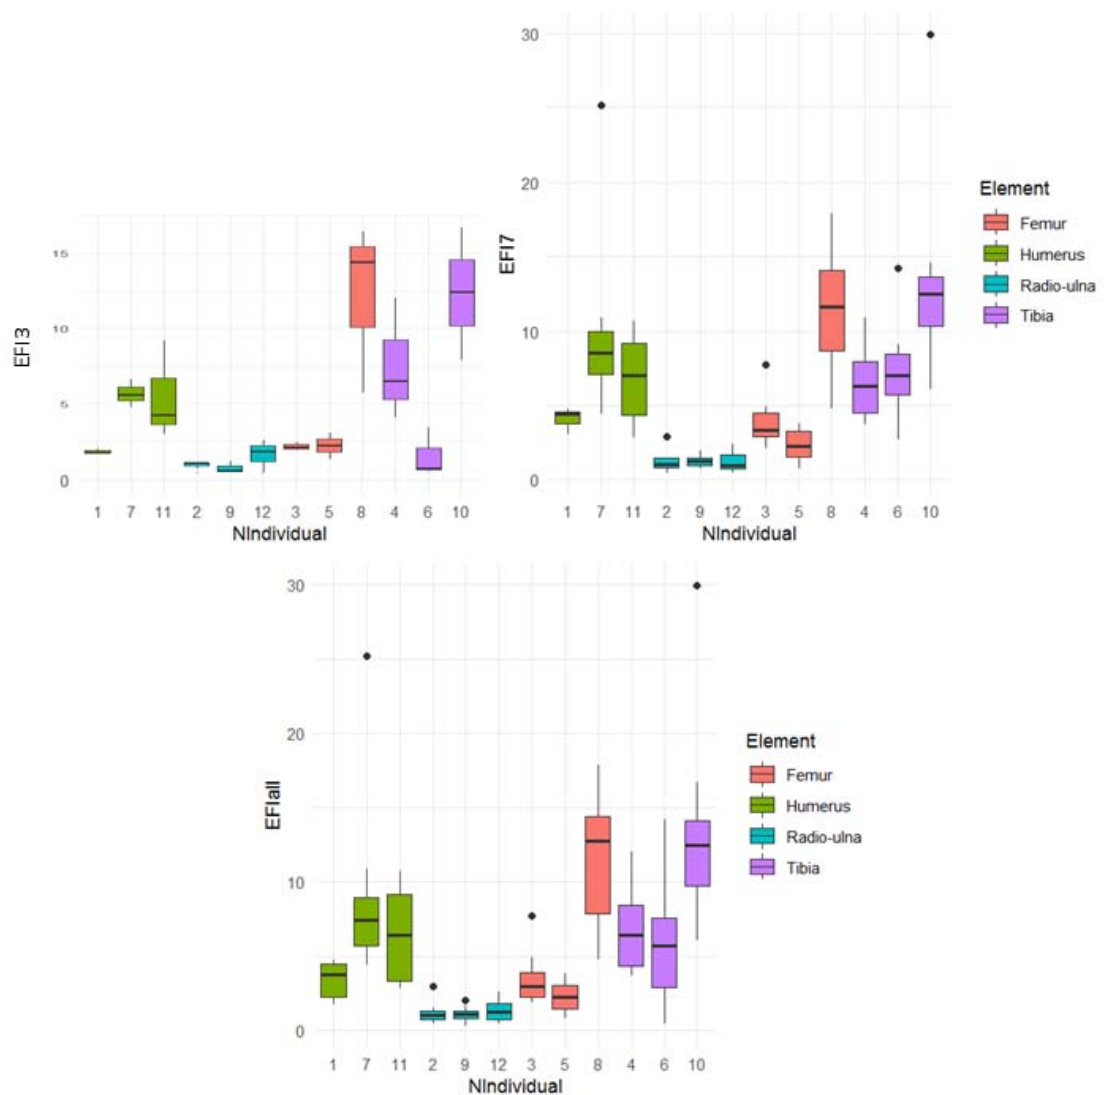

366

367 *Figure 2: Box plots of the Efficiency Index by Individual during the experiment regarding the third first tries, the last seventh*  
 368 *tries and all tries.*

369 **Data recorded on the faunal assemblage obtained**

370 Bone fragmentation

371 The experiments yielded 2,722 bone remains, among which 1,400 were refitted (Table 4). The  
 372 NSP of the tibias (32%) is higher than for the other elements, which are almost identical. Likewise, the  
 373 tibia NISP is the highest (34%) and the NISP of the humerus and radio-ulna are the lowest (19%).  
 374 Nonetheless, we noticed that the average NUSP is around 25% for all the elements. We did not  
 375 observe marked variability between individuals regarding the NISP, NUSP and the NSP  
 376 (Supplementary Information 4). However, volunteer n°4 produced more numerous NUSP, which also  
 377 affected the NSP. According to our application of the Spearman's rank correlation test, the NSP was

378 positively correlated with both the NUSP and the NISP for all the elements (all elements:  $\rho = 0.44$  and  
379  $\rho = 0.76$ ; humerus:  $\rho = 0.57$  and  $\rho = 0.79$ ; radio-ulna:  $\rho = 0.39$  and  $\rho = 0.68$ ; femur:  $\rho = 0.51$  and  $\rho =$   
380  $0.8$ ; tibia:  $\rho = 0.51$  and  $\rho = 0.8$ ). The NUSP and the NISP were also positively correlated between  
381 them (all elements:  $\rho = 0.91$ ; humerus:  $\rho = 0.93$ ; radio-ulna:  $\rho = 0.91$ ; femur:  $\rho = 0.9$ ; tibia:  $\rho = 0.9$ )  
382 (Supplementary Information 7).

### 383 Number of percussion marks

384 For one-third of the series, we recorded more percussion marks than the number of blows  
385 given by the experimenters (Table 4). This anomaly was observed for one individual for each bone  
386 element. Three of the individuals who produced a high number of percussion marks used an anvil, but  
387 this was not the case for volunteer n°8. The tibia and radio-ulna series presented numerous percussion  
388 marks (around 33%), corresponding to almost twice as many percussion marks as the femurs and  
389 humeri. We recorded the most abundant pits and grooves on the tibia and the radio-ulna series. The  
390 other percussion marks represented around 27% for all elements, with slightly less on the femurs  
391 (18%). Furthermore, these marks display a lower standard deviation ( $SD = 33$ ) than the pits ( $SD =$   
392  $263$ ) or all the percussion marks combined ( $SD = 245$ ). We observed an inter-individual difference, in  
393 particular for the first series of the humeri, radio-ulnas and tibias. A different observer recorded these  
394 series.

395 According to our application of the Spearman's rank correlation test, we noted a significant  
396 positive correlation between percussion marks with the number of pits and grooves on one hand, and  
397 the number of crushing marks, adhering flakes and notches ("CNA"), on the other, for all the long  
398 bones except the tibias ( $\rho_{NPM/Npit}$ : humerus = 0.95; radio-ulna = 0.96; femur = 0.95; tibia = 0.93; all  
399 elements = 0.93;  $\rho_{NPM/NCAN}$ : humerus = 0.35; radio-ulna = 0.7; femur = 0.35; tibia = -0.07; all elements  
400 = 0.48). The number of pits and grooves in the tibia series depended on the number of percussion  
401 marks, whereas the other marks were independent. The number of percussion marks causing a fracture  
402 ("CNA") was not significantly correlated with the other percussion marks (pits) ( $\rho_{NCAN/Npit}$ : humerus =  
403  $0.16$ ; radio-ulna = 0.59; femur = 0.29; tibia = -0.32; all elements = 0.24). However, we observed a  
404 positive correlation for the radio-ulna series and a negative one for the tibia series. The number of  
405 percussion marks producing fractures ("CNA") was positively correlated with the NSP for the  
406 humerus series ( $\rho = 0.34$ ). We observed a significant positive correlation between the "CNA"  
407 percussion marks and the weight of marrow and the NUSP for femurs and tibias (respectively, femurs:  
408  $\rho = 0.5$ ;  $\rho = 0.38$  and tibias:  $\rho = 0.62$ ;  $\rho = 0.92$ ). In addition, the number of pits and grooves on the  
409 tibias was correlated positively with the NISP and the NSP (respectively:  $\rho = 0.5$ ;  $\rho = 0.38$ ). Finally,  
410 the radio-ulnas showed a positive correlation between percussion marks causing breakage ("CNA")  
411 and the number of blows ( $\rho = 0.39$ ) (Supplementary data Figure 5).



412 The graph for the PCA analyses showed more differences between the tibia series on one hand  
413 and the radio-ulna and humerus series, on the other, in particular on the second dimension (Figure 3).  
414 These differences are mainly due to the NSP and the Efficiency Index. On the first dimension, radio-  
415 ulnas and humeri are opposed by the number of blows and by the number of tries.

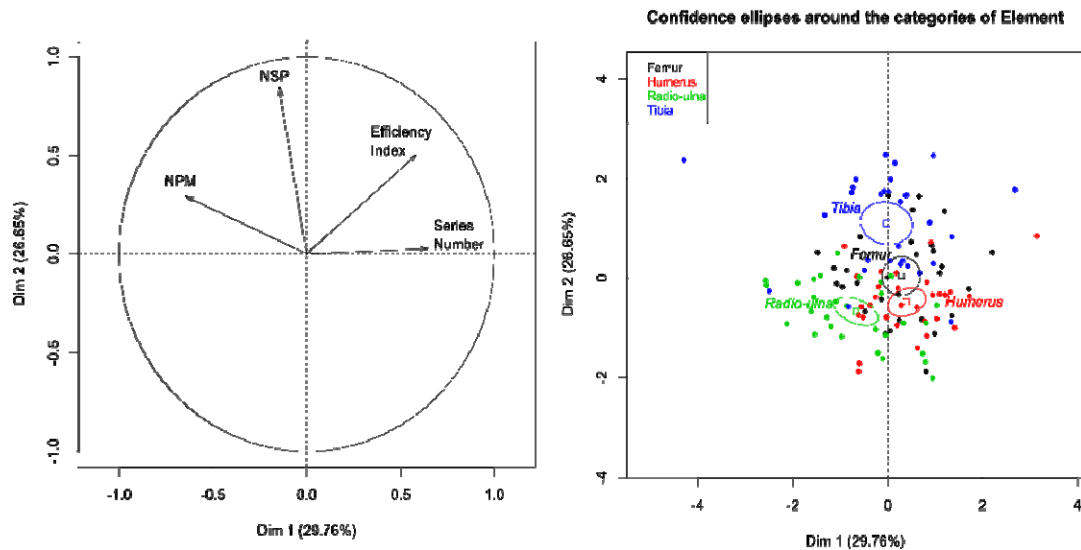

416

417 *Figure 3: PCA regarding the number of remains (NSP), the number of percussion marks (NPM), the Efficiency Index and the*  
418 *number of attempts (Series Number) with ellipses at 0.95.*

419

#### 420 Percussion mark types and spatial distribution

421 We observed around 5,000 percussion marks on the identified fragments (Table 6). Pits were  
422 the most numerous (78%) and grooves were the least frequent marks (2.6%). Both triangular and  
423 ovoid pits were present, but the former were less numerous. We recorded more pits on the tibias and  
424 radio-ulnas than on the other bone types. Adhering flakes and notches represented 15% of all the  
425 percussion marks. Crushing marks were one of the least numerous traces (4.9 %), and were often  
426 located close to the articular portions. We recorded fewer crushing marks and more grooves on tibias  
427 compared to the other long bones. Conversely, we documented the most numerous crushing marks and  
428 adhering flakes on the humeri. We noted high variation in the number of pits and adhering flakes  
429 depending on the observers who documented the percussion marks. This difference in recording did  
430 not influence the number of other marks to the same degree. We also observed inter-individual  
431 variability, in particular for the radio-ulna series.

432

433

434 *Table 6: Type of percussion marks by experimenter and by element on NISP (Total PM: Percussion marks total).*

| Element/<br>N°indiv | Percussion notch |              | Adhering flake |              | Triangular pit |              | Ovoid pit   |              | Grooves    |             | Crushing marks |              | Total PM    |
|---------------------|------------------|--------------|----------------|--------------|----------------|--------------|-------------|--------------|------------|-------------|----------------|--------------|-------------|
|                     |                  |              |                |              |                |              |             |              |            |             |                |              |             |
| <b>Femur</b>        | <b>85</b>        | <b>10.5%</b> | <b>26</b>      | <b>3.2%</b>  | <b>41</b>      | <b>5.1%</b>  | <b>574</b>  | <b>70.9%</b> | <b>22</b>  | <b>2.7%</b> | <b>62</b>      | <b>7.7%</b>  | <b>810</b>  |
| 3                   | 45               | 17.1%        | 10             | 3.8%         | 9              | 3.4%         | 173         | 65.8%        | 8          | 3.0%        | 18             | 6.8%         | 263         |
| 5                   | 15               | 4.6%         | 5              | 1.5%         | 14             | 4.3%         | 257         | 78.8%        | 11         | 3.4%        | 24             | 7.4%         | 326         |
| 8                   | 25               | 11.3%        | 11             | 5.0%         | 18             | 8.1%         | 144         | 65.2%        | 3          | 1.4%        | 20             | 9.0%         | 221         |
| <b>Humerus</b>      | <b>80</b>        | <b>9.2%</b>  | <b>93</b>      | <b>10.8%</b> | <b>95</b>      | <b>11.0%</b> | <b>462</b>  | <b>53.4%</b> | <b>33</b>  | <b>3.8%</b> | <b>102</b>     | <b>11.8%</b> | <b>865</b>  |
| 1                   | 39               | 20.1%        | 66             | 34.0%        | 8              | 4.1%         | 47          | 24.2%        | 17         | 8.8%        | 17             | 8.8%         | 194         |
| 7                   | 21               | 6.9%         | 18             | 5.9%         | 44             | 14.5%        | 166         | 54.6%        | 7          | 2.3%        | 48             | 15.8%        | 304         |
| 11                  | 20               | 5.4%         | 9              | 2.5%         | 43             | 11.7%        | 249         | 67.8%        | 9          | 2.5%        | 37             | 10.1%        | 367         |
| <b>Radio-ulna</b>   | <b>120</b>       | <b>7.4%</b>  | <b>77</b>      | <b>4.7%</b>  | <b>625</b>     | <b>38.5%</b> | <b>717</b>  | <b>44.1%</b> | <b>29</b>  | <b>1.8%</b> | <b>57</b>      | <b>3.5%</b>  | <b>1625</b> |
| 2                   | 66               | 36.7%        | 39             | 21.7%        | 9              | 5.0%         | 33          | 18.3%        | 7          | 3.9%        | 26             | 14.4%        | 180         |
| 9                   | 39               | 7.8%         | 17             | 3.4%         | 141            | 28.0%        | 275         | 54.7%        | 12         | 2.4%        | 19             | 3.8%         | 503         |
| 12                  | 15               | 1.6%         | 21             | 2.2%         | 475            | 50.4%        | 409         | 43.4%        | 10         | 1.1%        | 12             | 1.3%         | 942         |
| <b>Tibia</b>        | <b>174</b>       | <b>10.3%</b> | <b>86</b>      | <b>5.1%</b>  | <b>411</b>     | <b>24.4%</b> | <b>943</b>  | <b>55.9%</b> | <b>47</b>  | <b>2.8%</b> | <b>24</b>      | <b>1.4%</b>  | <b>1687</b> |
| 4                   | 93               | 33.2%        | 42             | 15.0%        | 26             | 9.3%         | 93          | 33.2%        | 19         | 6.8%        | 5              | 1.8%         | 280         |
| 6                   | 23               | 3.1%         | 31             | 4.2%         | 224            | 30.4%        | 435         | 58.9%        | 14         | 1.9%        | 11             | 1.5%         | 738         |
| 10                  | 58               | 8.7%         | 13             | 1.9%         | 161            | 24.1%        | 415         | 62.0%        | 14         | 2.1%        | 8              | 1.2%         | 669         |
| <b>Total</b>        | <b>459</b>       | <b>9.2%</b>  | <b>282</b>     | <b>5.7%</b>  | <b>1172</b>    | <b>23.5%</b> | <b>2696</b> | <b>54.1%</b> | <b>131</b> | <b>2.6%</b> | <b>245</b>     | <b>4.9%</b>  | <b>4987</b> |

435

436 The crushing marks were often situated close to the articular portions (Figure 4 and 5). We  
 437 documented some crushing marks on the medial diaphysis of the humeri and the radio-ulnas and the  
 438 tibias of volunteer n°4. Furthermore, we recorded most of the percussion marks on the diaphysis; only  
 439 the pits and grooves were located on the articular portions. It was difficult to observe a concentrated  
 440 area of percussion marks on the template on which we drew the marks. We merged all the percussion  
 441 marks derived from the 10 bone elements into a single series and performed an optimized hot spot  
 442 analysis to evaluate high concentration zones of percussion marks (Figure 6, 8, 10, 12). For each long  
 443 bone series, we tested all the percussion marks together, apart from percussion marks causing a  
 444 fracture (“CNA”) and the others (pits and grooves) (Figure 7, 9, 11, 13).

445

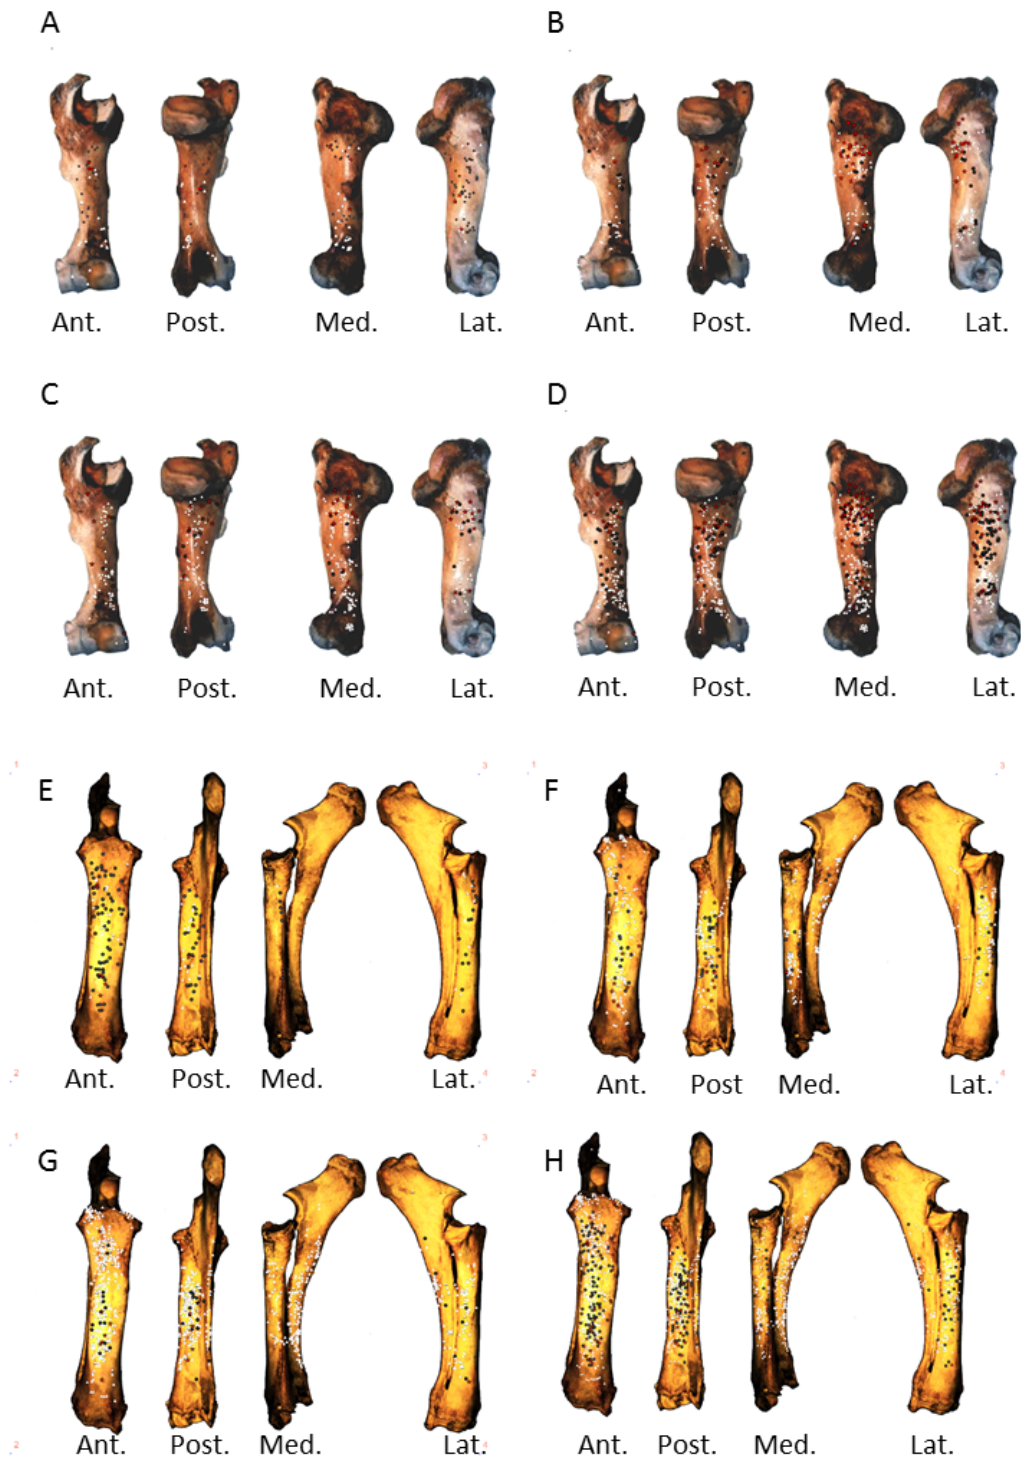

446

447 *Figure 4 : Distribution of percussion marks along the humerus and the radio-ulnas divided by type of percussion mark (red*  
448 *star: crushing marks, white triangle: pits and grooves and grey circle: notches and adhering flakes); A- Individual n°1; B-*  
449 *Individual n°7; C- Individual n°11; D- Merged humerus series; F- Individual n°2; G- Individual n°9; H- Individual n°12; I-*  
450 *Merged radio-ulnas series.*

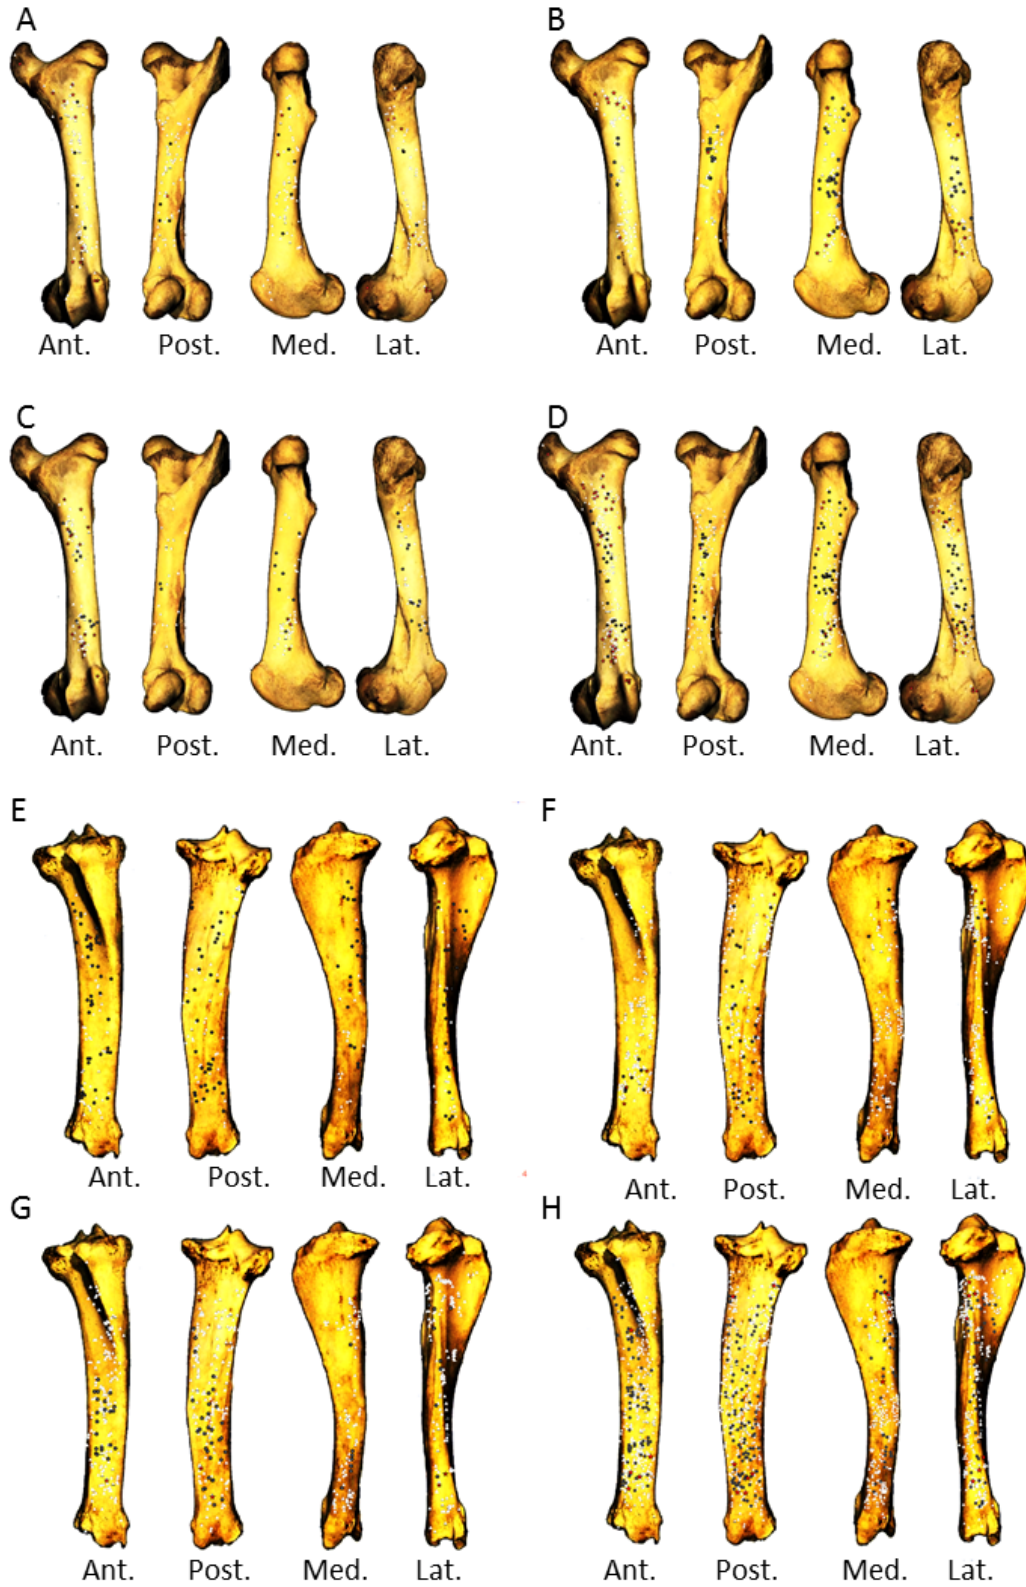

451

452 *Figure 5: Distribution of percussion marks along the femurs divided by type of percussion mark (red star: crushing marks,*  
453 *white triangle: pits and grooves and grey circle: notches and adhering flakes); A- Individual n°3; B- Individual n°5; C-*  
454 *Individual n°7; D- Merged femurs series; G- Individual n°4; H- Individual n°6; I- Individual n°10; J- Merged tibias series.*

455

456 The analyses taking into consideration all the percussion marks generally highlighted cold  
457 spots on the articular portions, for all the studied long bones. Conversely, hot spots were generally  
458 highlighted on shaft portions. In particular, most of the time the ulna was a cold spot for all the series  
459 of radio-ulnas. Likewise, for almost all the series, the tibia crest was a cold spot. The majority of the  
460 cold spots were observed on proximal and distal articular portions with the exception of the proximal  
461 portion of the radius in the “CNA” analyses) and on the tibia crest and ulnas (Figure 4 and 5).

462 The spatial analyses show that the majority of the high confidence hot spot zones for the  
463 humerus series were on the medial and lateral sides (Figure 6). Experimenter n°11 was an exception  
464 with hot spot areas on portion 4 of the posterior and anterior sides. The merged humerus series showed  
465 four high confidence hot spot zones on the medial and lateral sides. The hot spot zone on the medial  
466 side of portion 2 is the largest, and the one on the lateral side of portion 2 is the smallest. The last ones  
467 are located on portion 4 (Figure 6). When we consider the two types of percussion marks, we observe  
468 some differences in the location of the high confidence hot spot zone. The “CNA” were on the lateral  
469 and medial sides of portion 2, the pits and grooves were also on the medial side of portion 2, but also  
470 on all sides of portion 4 (Figure 7).

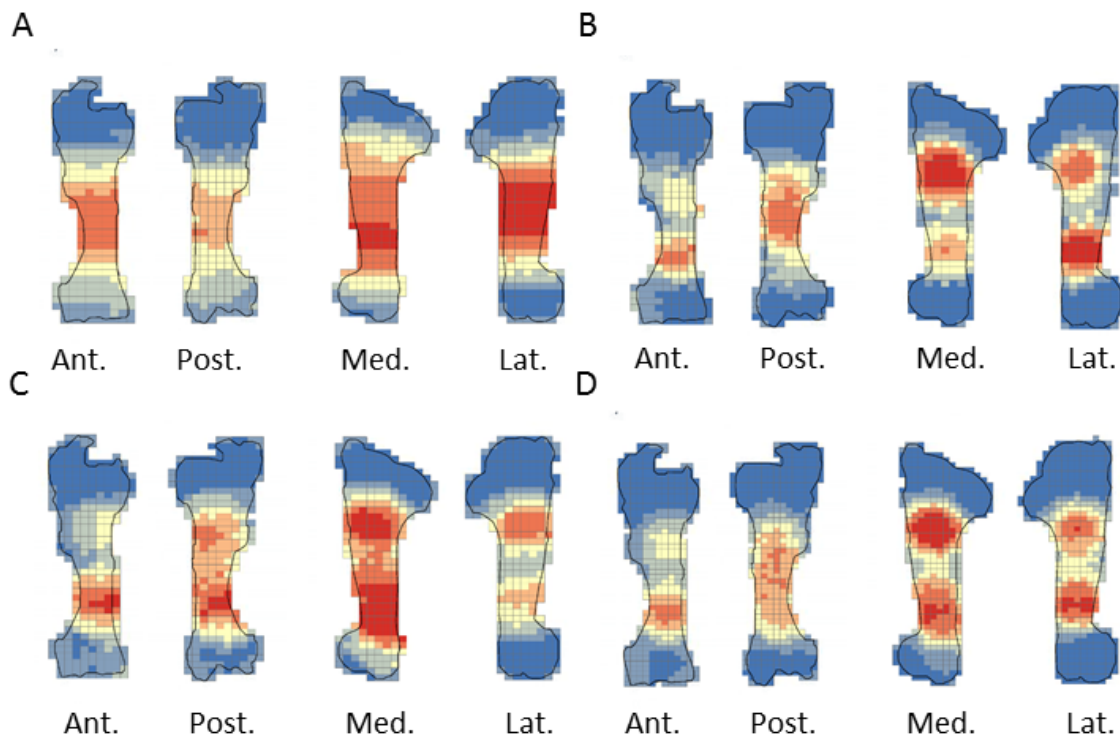

471

472 *Figure 6: Optimized Hot spot analysis of combined percussion marks from the humerus in each series: A- Individual n°1; B-*  
473 *Individual n°7; C- Individual n°11; D- Merged humerus series*

474

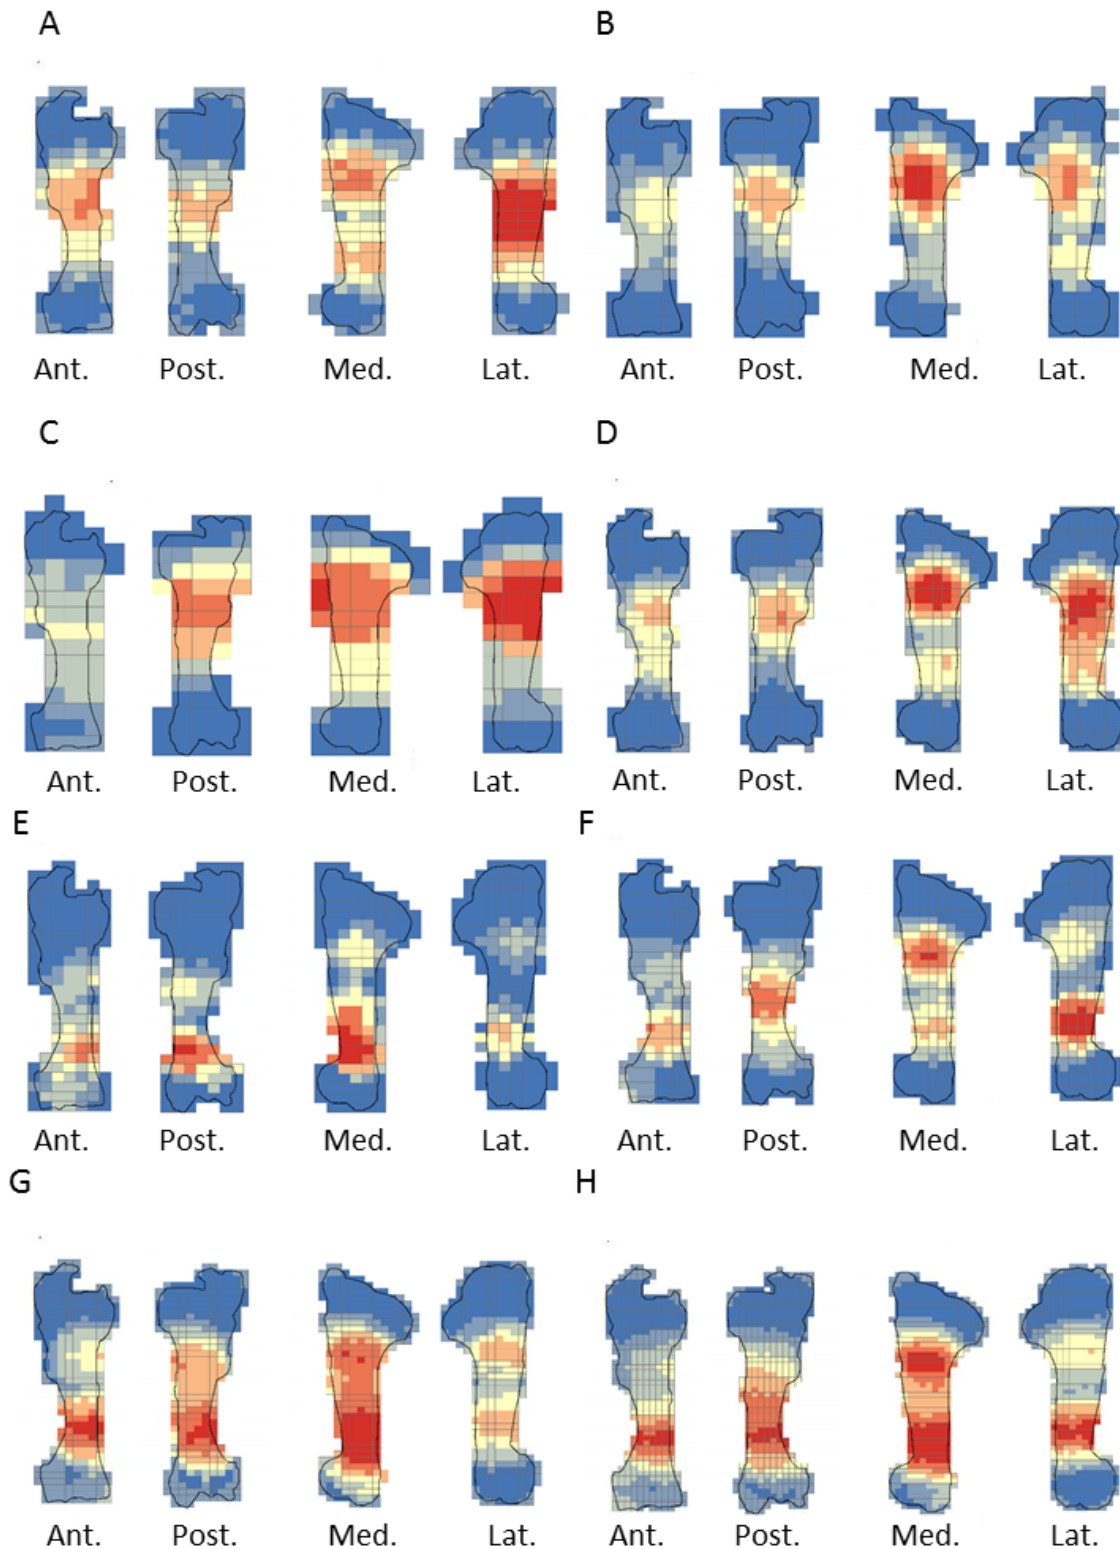

475

476

477

478

Figure 7: Optimized Hot spot analysis of combined percussion marks from the humerus in each series: A-E- Individual n°1; B-F- Individual n°5; C-G- Individual n°8; D-H- Merged humerus series; A, B, C and D: “CNA” Percussion marks and E, F, G and H: pits and grooves

479

480 For the radio-ulna series, we observed hot spot areas on the anterior and posterior sides for all  
481 the individuals (Figure 8). Individual n°9 was the only one who frequently hit portion 3-4 on the  
482 medial side. The analysis of the combined radius-ulna series highlighted a high confidence hot spot  
483 zone on the posterior side of diaphysis portions 2 and 3. This result reflected the general tendencies  
484 observed for all volunteers. The analysis defined a reduced area, portion 2 on the anterior side, as a hot  
485 spot zone, which was influenced by individual n°9. The results of the analysis showed that the high  
486 confidence hot spot zone for the merged radio-ulna was on portion 3 of the posterior side, and on the  
487 anterior side portion 3-4 for “CNA” marks only (Figure 9).

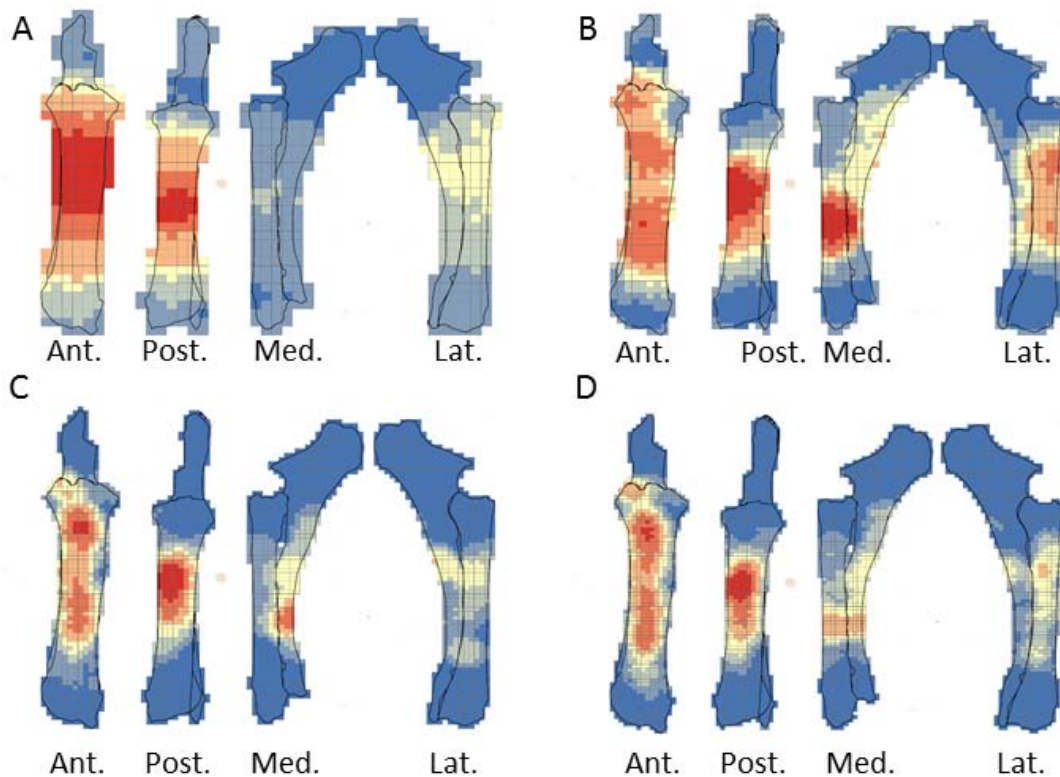

488

489 *Figure 8: Optimized Hot spot analysis of combined percussion marks from the radio-ulnas in each series: A- Individual n°2;*  
490 *B- Individual n°9; C- Individual n°12; D- Merged radio-ulnas series*

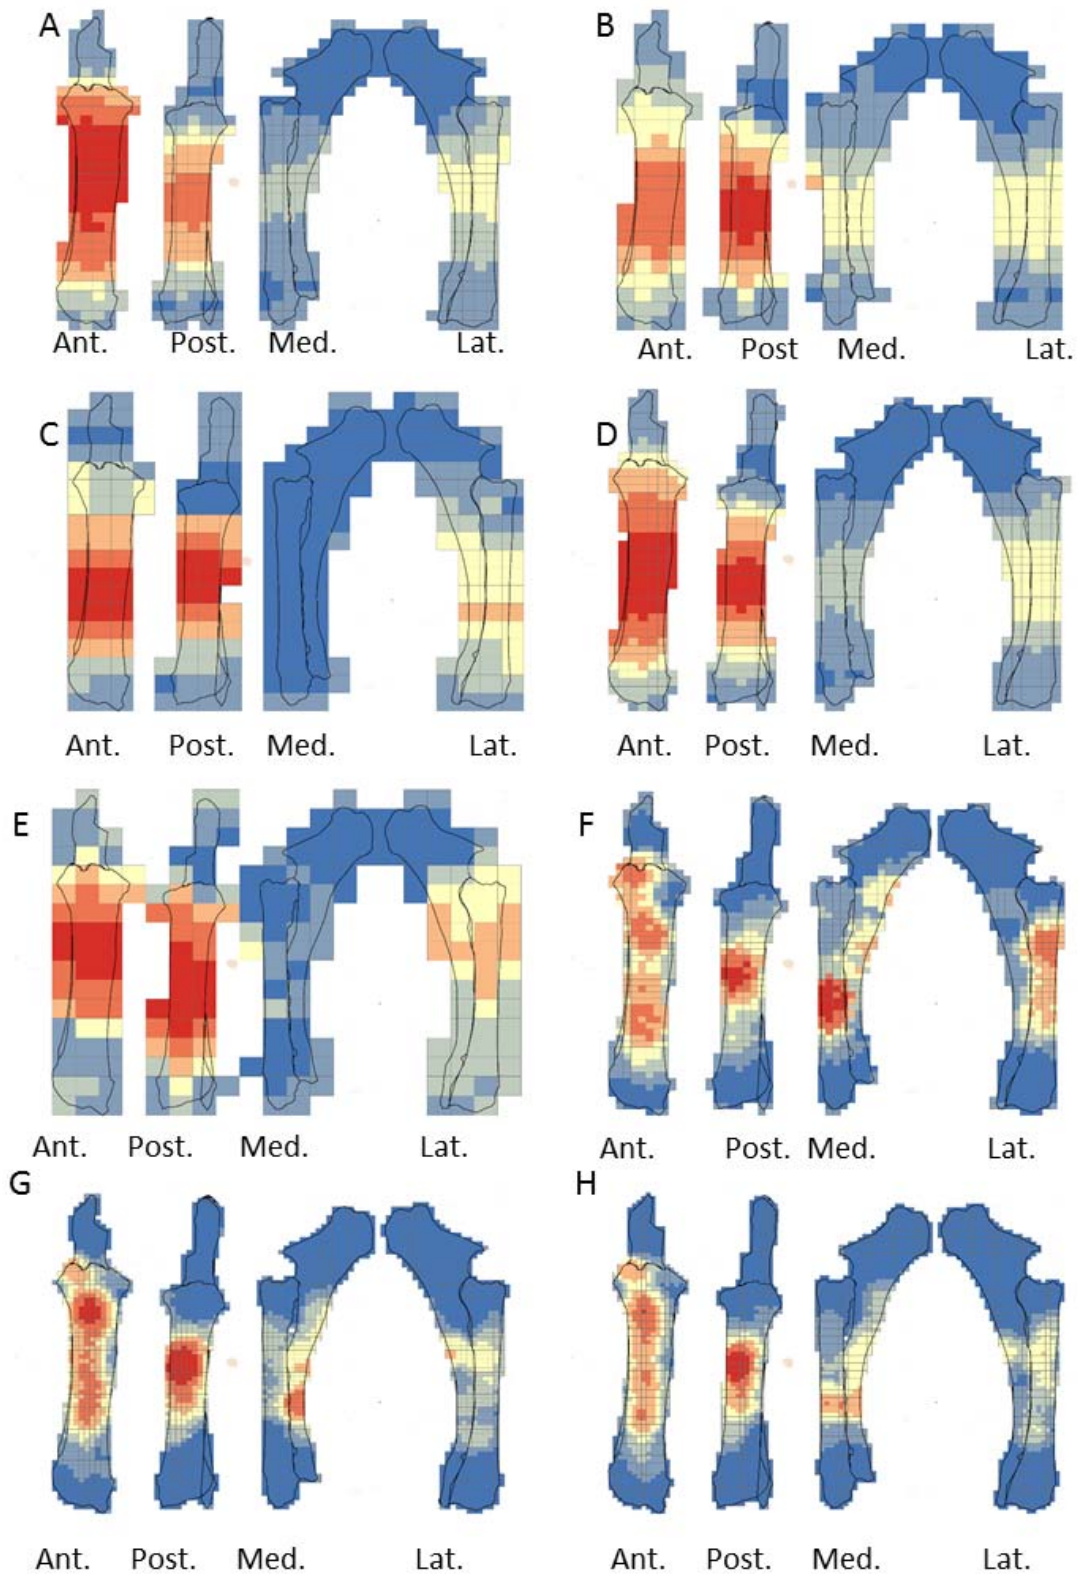

491  
492  
493  
494

Figure 9: Optimized Hot spot analysis of combined percussion marks from the radio-ulnas in each series: A-E- Individual n°2; B-F- Individual n°9; C-G- Individual n°11; D-H- Merged radio-ulnas series; A, B, C and D: "CNA" Percussion marks and E, F, G and H: pits and grooves



495

496 The spatial analyses of the femur series show diversified distribution of the hot spot zones  
497 along the diaphysis, depending on the experimenter (Figure 10). For the three series, all sides were a  
498 hot spot area at least once, reflecting high inter-individual variability. However, the spatial analysis of  
499 the merged femur series shows three confident hot spot zones, quite similar to individual n°8, on  
500 portions 2 and 4 on the anterior side, and on portions 3 and 4 on the medial side. High confidence hot  
501 spot zones for both percussion mark types are more numerous and dispersed on the merged femur than  
502 on the other bones (Figure 11).

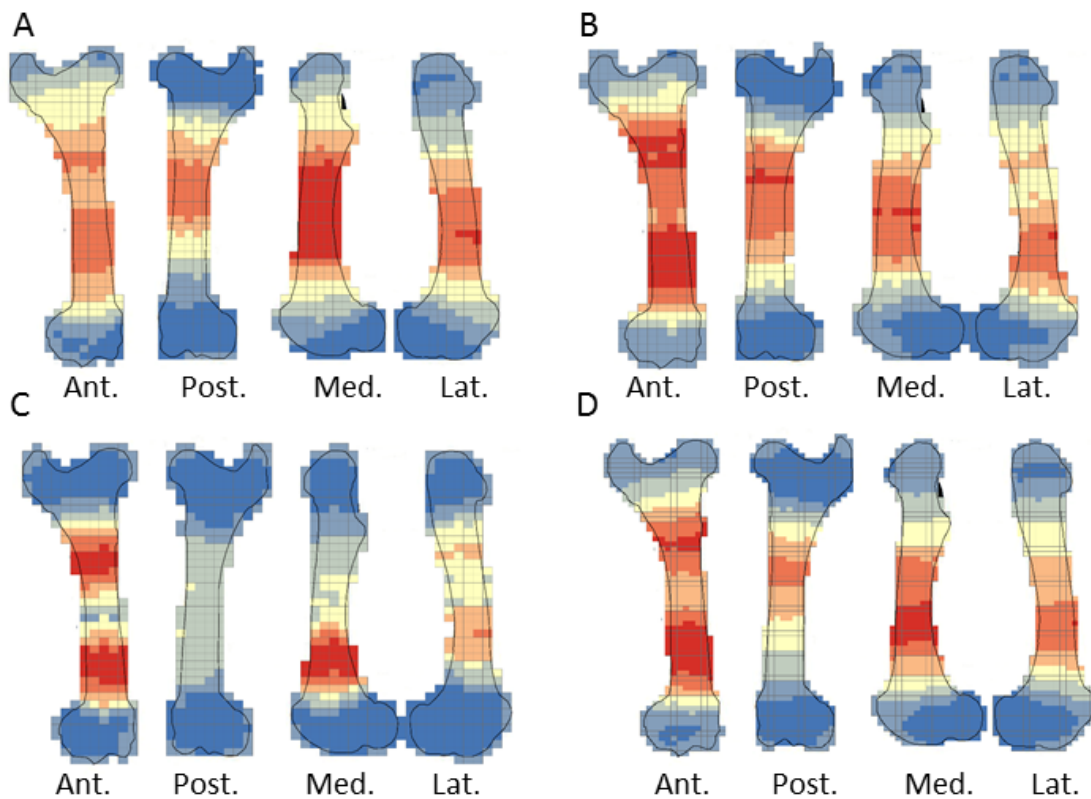

503

504 *Figure 10 Optimized Hot spot analysis of combined percussion marks from the femurs in each series: A- Individual n°3; B-*  
505 *Individual n°5; C- Individual n°7; D- Merged femurs series*

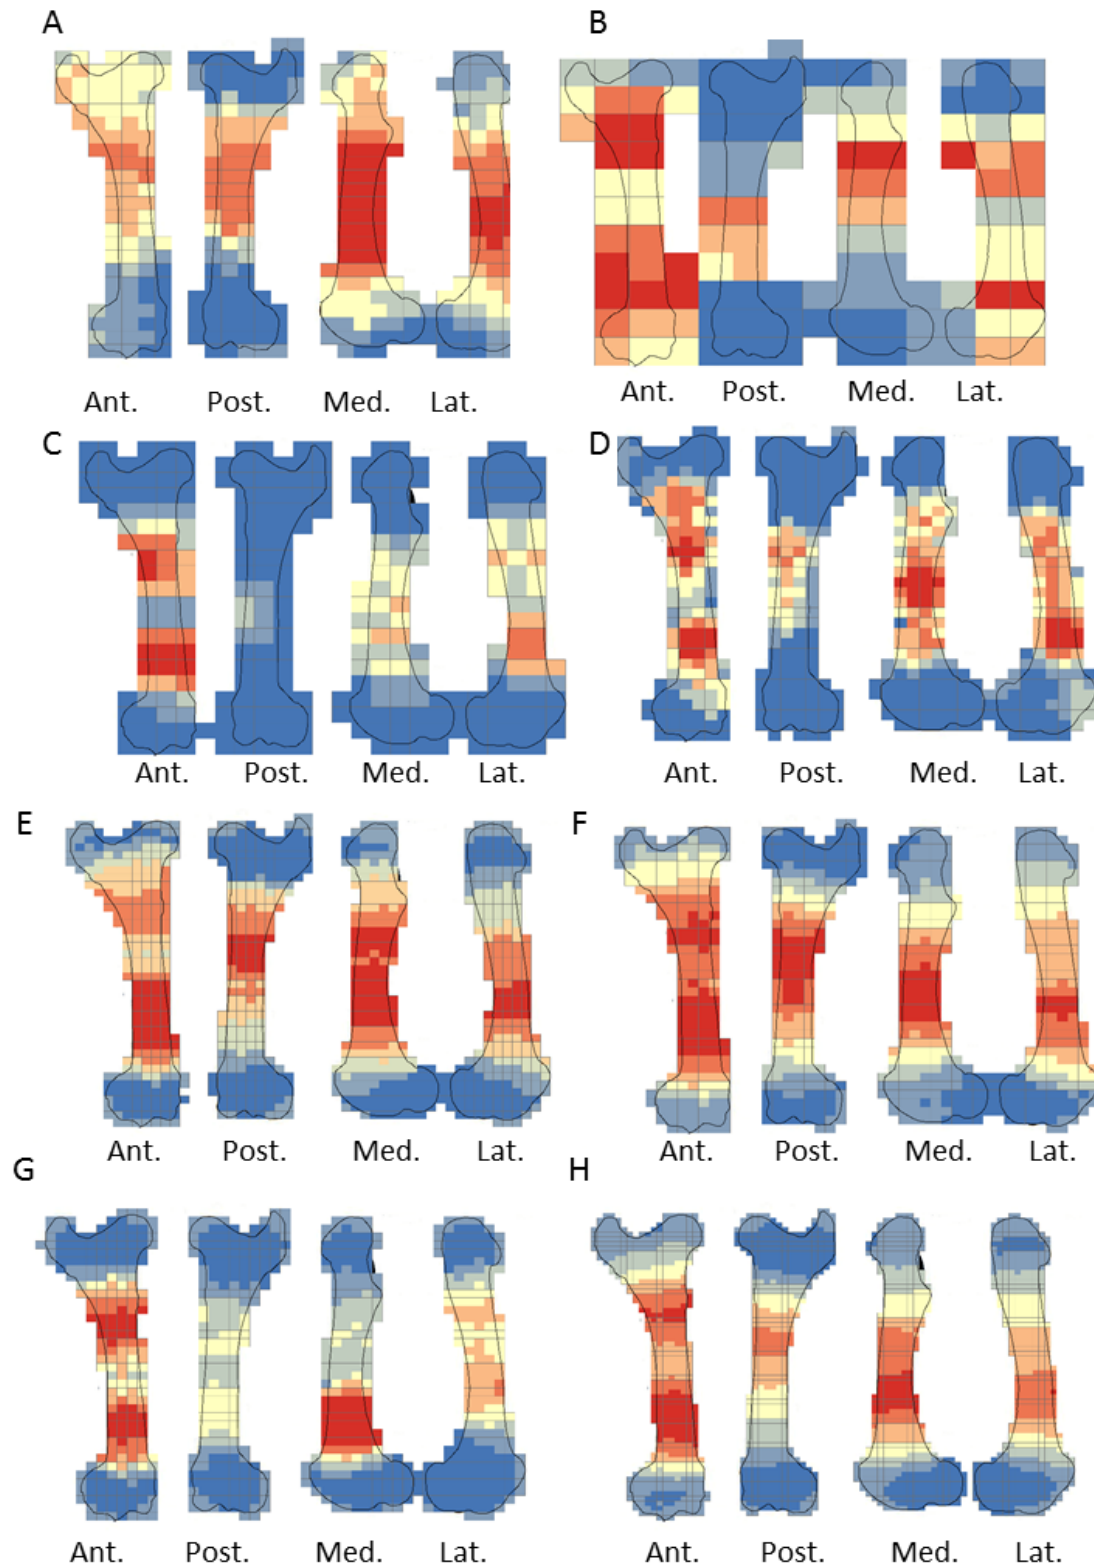

506

507 *Figure 11: Optimized Hot spot analysis of combined percussion marks from the femurs in each series: A-E- Individual n°3;*  
508 *B-F- Individual n°5; C-G- Individual n°7; D-H- Merged femurs series; A, B, C and D: "CNA" Percussion marks and E, F, G*  
509 *and H: pits and grooves.*

510

511 For the tibia series, we observed high confidence hot spot zones on anterior and posterior sides  
512 for each volunteer, in particular on portions 3 and 4 (Figure 12). The lateral side highlighted hot spot  
513 areas for individuals n°6 and n°10, especially on portion 2. The merged tibia series reflects the  
514 dispersion of the high confidence hot spot zones observed for each series. The spatial analyses showed  
515 six hot spot zones, two of which very limited in size. However, the “CNA” area of high confidence hot  
516 spot was only on the posterior side of portions 3 and 4. Zones with pits and grooves were numerous,  
517 distributed on the diaphysis of the lateral, anterior and posterior sides (Figure 13).

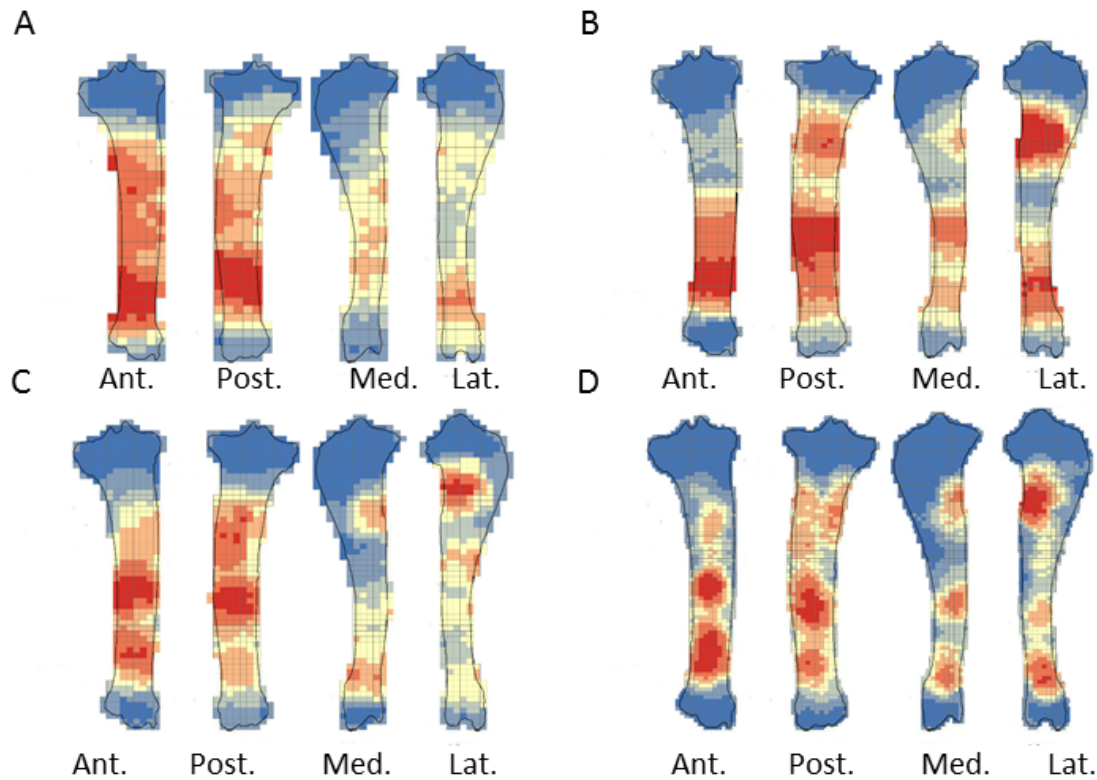

518

519 *Figure 12: Optimized Hot spot analysis of combined percussion marks from the tibias in each series: A- Individual n°4; B-*  
520 *individual n°6; C- Individual n°10; D- Merged tibias series*

521

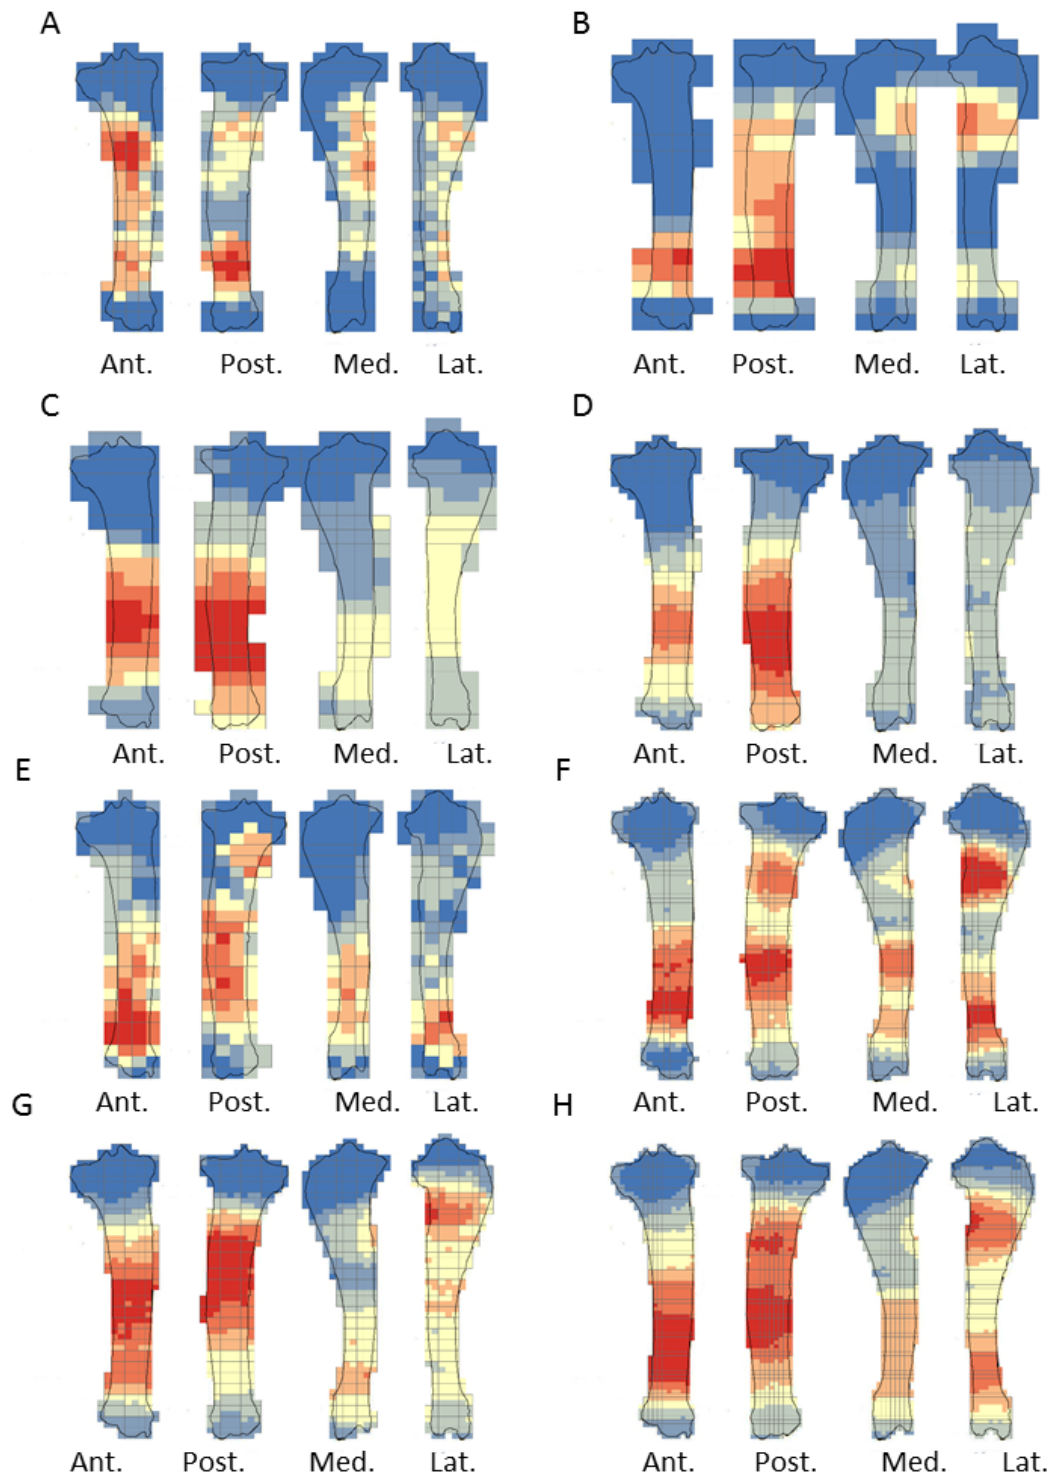

522

523 *Figure 13: Optimized Hot spot analysis of combined percussion marks from the tibias in each series: A-E- Individual n°4; B-*  
524 *F- Individual n°6; C-G- Individual n°10; D-H- Merged tibias series; A, B, C and D: "CNA" Percussion marks and E, F, G*  
525 *and H: pits and grooves.*

526

527 **Discussion**

528 The most significant information highlighted by our experiments is related to the variability  
529 observed during the breakage process and that observed among the bone elements produced during  
530 experimentation. Indeed, some individual behavioural tendencies emerge during the breakage process,  
531 as well as patterns in the production and distribution of percussion marks. Our results also brought to  
532 light the influence of long bone morphology in an intuitiveness context.

533 **How do individual gesture alternatives and bone elements influence breakage**  
534 **methods?**

535 Some volunteers applied reduced force when they hit the bones, especially during the first  
536 attempts. Initially, experimenters tested the resistance of the bones and some were afraid of hurting  
537 themselves. In these cases, they hit the bones with less force. Likewise, at the end of the experiment,  
538 tiredness resulted in a reduction of the force applied. After the activity, most of the experimenters had  
539 a shaking hand, and all the volunteers had aches and pains the following days. This shows that marrow  
540 extraction requires a good physical condition and/or practice and/or good technical skill. During the  
541 activity, some volunteers progressed or developed habits or a routine. However, they did not seem to  
542 become more efficient at optimally breaking bone to extract the maximum quantity of marrow. In  
543 addition, during the experiment, the volunteers mentioned inter-element differences, whereby some  
544 bones were easier to break than others, irrespective of the experience acquired or the degree of  
545 exhaustion. Moreover, it is important to note that sometimes the hammerstone slipped on the cortical  
546 surface or slipped out of the experimenter's hand. This happened especially when the hammerstone  
547 and hands were covered in grease after several tries. When an individual broke several bones, he/she  
548 had to clean the tools or his/her hands to pursue marrow extraction.

549 One of the most significant results of our experiment was the variability of individual  
550 behaviour during marrow recovery. One volunteer adopted an unexpected posture: a cross-legged  
551 seated position. However, the observed variability only comprised five positions. In addition to these  
552 postural variations, we documented some non-linear behaviour during the experiment. Our experiment  
553 showed that non-trained experimenters could change their position at different moments during both  
554 the marrow extraction from one bone and throughout the ten bone series. However, the majority of the  
555 experimenters kept the same position or developed some kind of habit or routine in their practice. This  
556 routine concerned the individual and bone position and the way of grasping the bone and percussor.  
557 The auto-learning developed by experimenters to be as efficient as possible involved their position and  
558 their way of grasping the bone and percussor. The position influences the amplitude of the gestures,  
559 the force involved in breakage and the location of the blows. The standing position was only selected  
560 by women, and not by all of them. Sex did not influence the choice of posture or position of the bone.  
561 No link was found between the gender of the experimenter and how consistent they were in their  
562 posture choice or in positioning the bone throughout the experiment. Likewise, sex did not seem to

563 influence the way the percussor was grasped or the use of an anvil. These results could provide some  
564 evidence regarding the organization of butchery task distribution during the Palaeolithic. We noted  
565 that the posture adopted by individuals did not vary in relation to the skeletal element. However, the  
566 type of long bones seemed to affect practices and gestures, in particular for tibias and radio-ulnas. This  
567 observation could be related to the high number of blows applied to these two bone types by novice  
568 experimenters.

569 Although experimenters proceeded differently depending on the elements, we noticed some  
570 divergences in our results, in particular between radio-ulnas and tibias. The experimenters who broke  
571 the radio-ulna series had a very low yield in relation to the number of blows. On the whole, the  
572 opposite is true for the tibia series, for which individuals had a high yield. Thus, volunteers who broke  
573 radio-ulnas found the activity quite difficult and considered the marrow to be of relatively poor  
574 quality. On the other hand, the volunteers who broke tibias found the activity quite easy and the  
575 extracted marrow was considered to be of relatively good quality. Furthermore, experimenters used  
576 two hands at least once for breaking radio-ulnas, but never for tibias. The use of both hands to grasp  
577 the pebble was an expression of the difficulty felt by the individuals breaking radio-ulnas. Regarding  
578 the NSP produced for both these elements, we recorded the highest number of blows and the lowest  
579 NSP for the radio-ulnas and the exact opposite for the tibias of our sample. This was why we observed  
580 a high number of pits and the lowest number of “CNA” percussion marks on radio-ulnas. Contrary to  
581 the tibia, the breakage of a radio-ulna of an animal such as a cow requires some mastery. Numerous  
582 studies have highlighted differences between the volumes of the medullary cavity of these two long  
583 bones. Tibias and femurs comprise large medullary cavities. On the other hand, medullary cavities are  
584 smaller for radio-ulnas and humeri and thus contain a lesser quantity of yellow marrow (Binford,  
585 1981, 1978; Jones and Metcalfe, 1988). Therefore, the EFI (Efficiency Index) highlighted differences  
586 between the energy spent by counting the blows and the quantity of marrow extracted, in part because  
587 of the difference in volume between the radio-ulna and tibia series. However, medullary cavity volume  
588 alone cannot account for all the differences observed between bones. In terms of density, tibias and  
589 radiuses show the highest diaphysis density of all the long bones used in our experiment (Lam et al.,  
590 1999; Lyman, 1994). However, they seem to react differently to blows. This difference was  
591 highlighted by the PCA, showing an opposition between the radio-ulna and the tibia series regarding  
592 the NSP, the Efficiency Index and the number of percussion marks.

593

#### 594 **What correlation can be made between blows and percussion marks?**

595 Various researchers have stressed that the aim of mastering percussion breakage was to reduce  
596 the number of blows required to remove all the marrow from the medullary cavity (Capaldo and  
597 Blumenschine, 1994; Galán et al., 2009; Moclán and Domínguez-Rodrigo, 2018). For this reason, it

598 was expected that novice experimenters would average more blows than experts. Indeed, we noted a  
 599 high number of blows, ranging from 6-279, with an average of 52, for the entire bone experiment. If  
 600 we compare our experiment with previous works, we observe a huge difference between the average  
 601 number and range of blows (Table 7). The average number of blows by volunteers in our experiment  
 602 was higher than the maximum in other studies. In particular, for their first tries, two individuals hit the  
 603 bones more than 200 times. Besides, none of the experimenters stopped hitting the bones after the first  
 604 fracture. The presence of the periosteum on the bones was not sufficient to explain the very high  
 605 number of recorded blows. Indeed, during some experiments quoted in Table 7, the periosteum was  
 606 not removed (Martin, 1910; Pickering and Egeland, 2006; Rovira Formento, 2010). Novice volunteers  
 607 tried to break the element further in order to recover the maximum amount of marrow. The weighing  
 608 of the marrow after each attempt motivated some of them. At the individual scale, we observed some  
 609 increase or decrease in the number of blows at the beginning and the end of the experiments, but  
 610 overall, we did not highlight significant progress for all the experimenters or a particular element. The  
 611 only exception was the humerus, for which the number of blows decreased for all the volunteers. The  
 612 number of blows and the experimenters' decision to pursue breakage after the first fracture can  
 613 increase the NSP. Intensive breakage can reflect a high number of blows in order to access the yellow  
 614 marrow. In addition, we observed the quasi-systematic conservation of the epiphyses in their entirety.  
 615 Indeed, it is not necessary to break the articular portions for the extraction of yellow marrow only.

616 *Table 7: Listing of different experiment of bone breakage for marrow extraction and comparing data.*

| References                    | Species    | Element                         | Range of number of blows | Mean of number of blows | NSP/NME=AverageNSP         |
|-------------------------------|------------|---------------------------------|--------------------------|-------------------------|----------------------------|
| (Rovira Formento, 2010)       | Horse      | Femurs                          | 1-27                     | 8.8                     | -                          |
| (Galán et al., 2009)          | Cow        | Humerus<br>Femurs<br>Radio-ulna | -<br>-<br>-              | -<br>-<br>-             | 145/22=6.5                 |
| (Pickering and Egeland, 2006) | White deer | Radius<br>Humerus               | 2-15<br>1-4              | 6<br>2                  | 811/38=21.3<br>472/36=13.1 |
| (Thiébaud et al., 2007)       | Cow        | Femurs                          | 1-8                      | 3.5                     | 189/13=14.53               |
| (De la Torre et al., 2013)    | Cow        | Limb bones                      | -                        | 20                      | -                          |
| (Martin, 1910)                | Horse      | Femurs<br>Tibia                 | 1-3<br>3                 | 2<br>3                  | -                          |

617

618 Interestingly, the number of blows is not correlated with the number of percussion marks.  
 619 Comparing the two values, we noted that for two-thirds of the individual bone elements, the number of  
 620 blows is higher than the number of percussion marks and more surprisingly, for one-third of the bone

621 elements, the number of percussion marks is higher than the number of blows. For one experimenter  
622 per bone element (humerus: n°7, radio-ulna: n°12, femur: n°8 and tibia: n°10), the number of blows  
623 was inferior to the number of percussion marks.

624 In most cases (more than 95%), the number of pits and grooves or “CNA” marks was different  
625 to the number of hits. In an archaeological context, it can thus be impossible to infer the number of  
626 blows from the number of percussion marks. The use of an anvil or the hammerstone could explain the  
627 differences recorded between the number of marks and blows. In their experiment, (Pickering and  
628 Egeland, 2006) also observed a majority of pits among the recorded percussion marks. They  
629 concluded that most of these pits were produced by the counterblow of the anvil. In our experiment,  
630 pits were generally more numerous than the other marks (67 %). Thus, pits and grooves result from the  
631 rebound effect caused by the hammerstone or by the anvil due to the counterblow. In this last case, the  
632 counterblow is not a mark; but rather the result of the rebound effect of the bone on the anvil. The  
633 marks due to counterblows include pits, microstriations, outer conchoidal scars or notches (e.g.,:  
634 Boulestin, 1999; Capaldo and Blumenschine, 1994; Gifford-Gonzalez, 2018; Johnson, 1985; Lyman,  
635 1994; Outram, 2002), located on the opposite side to the blow. Due to the multiplicity of traces and the  
636 overlapping of the traces produced by the hammerstone or when the long bone is batted against a hard  
637 surface, it is difficult to discriminate blow marks from counterblow marks. In addition, we recorded  
638 some triangular pits and grooves even though experimenters only used non-retouched pebbles. These  
639 marks, characterized by straight and sharp edges, could be the product of the rebound effect from the  
640 anvil. Therefore, the use of an anvil could create supplementary marks during the blow. Two  
641 volunteers (n°8 and 11) did not use the anvil at all, but simply laid the bones on the ground.  
642 Nonetheless, some triangular pits and grooves were identified (around 10 %). However, we sometimes  
643 recorded more marks than blows. Thus, the counterblow is not the sole explanation for the difference  
644 between the number of blows and the number of percussion marks. It is possible that the shape of the  
645 hammerstone, the impact with the ground or the collision of bones between them during the activity  
646 created several pits. More than one-quarter of the recorded pits were very small and superficial, with a  
647 diameter of 10 mm or less (28%). In an archaeological context, the different taphonomical processes,  
648 such as trampling, for example (Domínguez-Rodrigo et al., 2010), can erase these pits or produce  
649 others. For the remaining two-thirds of the broken elements, we recorded a lower number of  
650 percussion marks than blows. In our protocol, the periosteum was never removed. The presence of the  
651 periosteum, which absorbed some of the force of the blows, could partly explain this difference.

## 652 **Percussion marks distribution**

653 The areas where the least percussion marks were observed, apart from the articular portions,  
654 were the anterior crest of the tibia and the diaphysis of the ulna. The distribution of percussion marks  
655 showed that novice experimenters avoided shape constraints, such as bone protuberances. They  
656 seemed to prefer relatively flat areas. Thus, the spatial analyses for tibias and radio-ulnas highlighted



657 significant hot spot zones for the merged series, where bone shape was the flattest. Furthermore, for  
658 the “CNA” marks, a single hot spot area was most impacted on the tibias. This area was located on the  
659 posterior side of the distal diaphysis. It was one of the flattest and smoothest zones of the tibias with  
660 no muscular lines. Moreover, the distal diaphysis is the least dense portion of the tibia (index density =  
661 44) (Lyman, 1994). Regarding the “CNA” marks, two specific high confidence hot spot zones were  
662 identified on the radio-ulnas. They were located on relatively flat and easily accessible areas to blows.  
663 The first one is situated on the anterior side of the medial shaft, which is relatively flat considering the  
664 globally very arched shape of the radio-ulna. The radio-ulna section in this area is flattened compared  
665 with portions 3 and 4, which present a semi-lunar crescent shape. When the bone was placed on a  
666 small anvil, one of the best ways to stabilize the radio-ulna was to place the medial shaft on the  
667 posterior side. Thus, the anterior side was exposed and very accessible. The other hot spot area was on  
668 the exact opposite side because, on the ground, it was easier to place the bone on the anterior side to  
669 avoid interference from the ulna. In addition, when the radio-ulna was positioned on the anterior side,  
670 this area was located at the inflexion point of the bone curve and was the most accessible to hit.  
671 Furthermore, these areas were located on portions 2 and 3, which are the densest part of the radius  
672 (marrow index = 0.56 & 0.62).

673 Unlike zeugopods, the diaphyseal section of humeri and femurs is rather cylindrical. Their  
674 diaphyses are relatively straight in comparison to the radio-ulna. The articular portion shows important  
675 differences in terms of stability. The humerus is more stable on its lateral and medial sides whereas the  
676 femur is relatively stable on all sides. Indeed, the very rounded shape of the humerus head causes  
677 instability when placed on its posterior side. This is why the distribution of percussion marks,  
678 highlighted by the hot spot analyses, is concentrated on the lateral and medial sides. Pit and groove  
679 marks are generally distributed on the distal part of the bone. This part of the humerus diaphysis is  
680 denser than the others (density index = 0.48). Conversely, the hot spot area of “CNA” marks is only  
681 located on the proximal shaft portion, in the least dense part of the bone (index density = 0.25). These  
682 “CNA” marks represent one of the most the numerous hot spot zones. In addition, these hot spot areas  
683 were similar for the three merged spatial analyses of the femurs (all percussion marks, “CNA” marks  
684 and pits and groove marks). All the diaphysis portions were hot spot zones at least once,  
685 independently of density variability.

686 Thus, percussion mark location is influenced by the morphological constraints of bones, in  
687 particular for the radio-ulna, the tibia and the humerus, in an intuitive context. Volunteers were faced  
688 with bone marrow extraction for the first time and were highly influenced by shape constraints. These  
689 constraints were so strong that volunteers continued hitting these zones after many attempts, as bone  
690 stability and the accessibility of these areas facilitated breakage and therefore marrow recovery.  
691 Nonetheless, the absence of morphological constraints seems to highlight novice choices. Therefore,

692 based on the results of our analyses, in an intuitive context, femurs seem to be the bones for which  
693 individual variability was highest.

694

### 695 **Archaeological, experimental and ethnographical data comparisons: some** 696 **convergences**

697 Binford (1981) described the practices and gestures of the Nunamiut in order to infer past  
698 hunter-gatherer behaviour from archaeological assemblages. His observations describe systematic  
699 breakage, hitting the same bone portions each time. Moreover, in the same way as experiments,  
700 ethnographical studies highlight wide-ranging variables, which are hardly accessible in archaeological  
701 contexts.

702 We highlighted the existence of a preferential pattern for the intuitive breakage of long bones,  
703 using the spatial analysis of the location of percussion marks on radio-ulnas, tibias and humeri.  
704 Archaeological and ethnographical studies focusing on the distribution of percussion marks along long  
705 bone diaphyses have revealed the existence of preferentially impacted areas (Binford, 1981; Blasco et  
706 al., 2013; Masset et al., 2016; Moclán and Domínguez-Rodrigo, 2018; Vettese et al., 2017). The  
707 comparison between these results and ours underlines the influence of bone shape on some systematic  
708 practices of extant and past hunter-gatherers (Figure 14). For radio-ulnas, archaeologists record  
709 percussion marks on the anterior side, in particular in the faunal assemblages of level XVIIc of  
710 Bolomor Cave (Blasco et al., 2013) and at the Abri du Maras layer 4.1 (Vettese et al., 2017), where  
711 some tendencies were observed (Middle Palaeolithic), Combe Saunière and Cuzoul de Vers (Castel,  
712 1999) and the “upper unit” of Saint-Germain-la-Rivière (Costamagno, 1999; Masset et al., 2016) and  
713 the Rond du Barry (Upper Palaeolithic), and also among the extant Nunamiut (Binford, 1981). The  
714 areas highlighted by hot spot analyses were similar to the areas of percussion mark concentrations in  
715 these comparative examples. These faunal assemblages represent practically all the Palaeolithic sites  
716 for which percussion mark distribution has been studied. The aforementioned faunal assemblages are  
717 dominated by different species: reindeer, saiga antelope, ibex, red deer or larger-sized ungulates, like  
718 horse or bison, and in our experiment, cow. This comparison suggests that the high shape constraints  
719 of the radio-ulnas strongly influenced the distribution of percussion marks on whole long bone  
720 remains in an archaeological level independently of ungulate size. Furthermore, for ungulates, the fact  
721 that the radius is merged with the ulna constrains the morphological shape of the bones. However,  
722 level IV of Bolomor Cave and the “lower unit” of Saint-Germain-la-Rivière showed different patterns  
723 on the lateral side for the former site and both lateral and medial sides for the latter (Figure 14).

724 For the humerus, the distribution of percussion marks was quite similar to our observations.  
725 Almost all the sites presented in the work of Masset et al. (2016) reveal a pattern on the medial and/or  
726 lateral sides, with the sole exception of Bolomor Cave level IV. Compared to the other sites, we noted

727 variability in the exact area impacted by percussion marks, but we observed a preference for portion 4  
 728 in the majority of the assemblages. A minority of the studied tibia series showed a systematic pattern  
 729 or strong tendencies. The posterior sides displayed the most areas of percussion mark concentration.  
 730 Finally, most of the femur series from the archaeological sites studied do not seem to show systematic  
 731 distribution, with the exception of level VI of Bolomor, which indicates two preferentially impacted  
 732 zones, and the Abri du Maras, where one area was more impacted than the other. We observe  
 733 similarities with the Nunamiut for the anterior side.

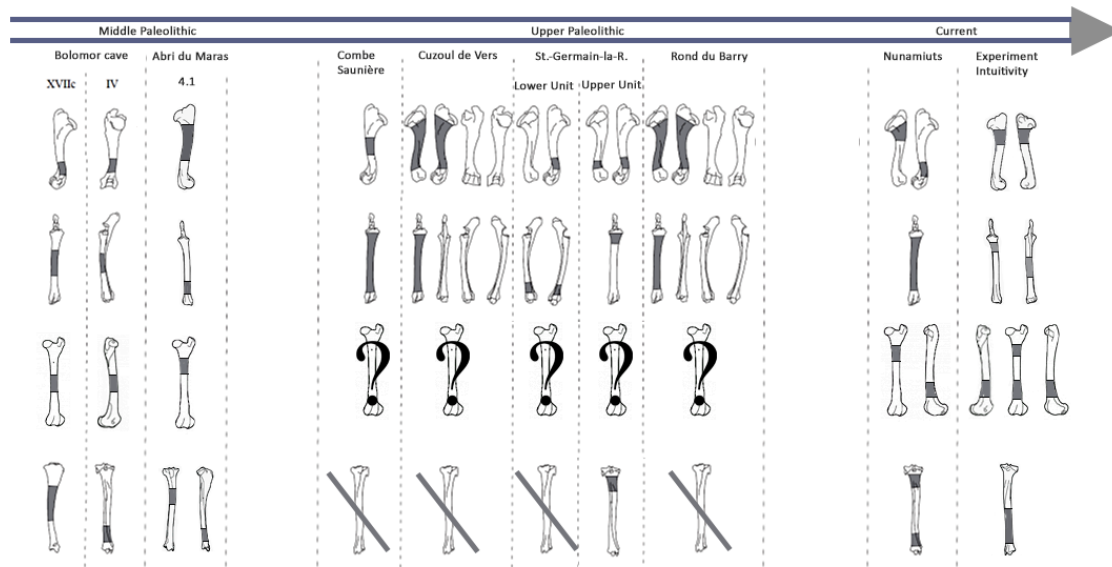

734

735 *Figure 14 : Location of percussion marks (grey areas) for the humerus, radio-ulna, femur, and tibia for sites from the Middle*  
 736 *Paleolithic: Bolomor cave (ungulates: Blasco et al., 2013b.) and Abri du Maras (middle sized-ungulates: Vettese et al.*  
 737 *2017); the Upper Paleolithic: Combe Saunière (reindeer, Solutrean: Castel, 1999), Cuzoul de Vers (reindeer, Badegoulian:*  
 738 *Castel, 1999), Saint-Germain-la-Rivière, Lower Unit (saiga antelope, Lower Magdalenian: Costamagno, 1999) and Upper*  
 739 *Unit (saiga antelope: Masset et al. 2016), Rond du Barry (ibex, Upper Magdalenian: Costamagno, 1999), for these series the*  
 740 *data regarding the femurs were missing and most of the tibias did not present higher tendencies; Current: Nunamiut people*  
 741 *of Alaska (reindeer: Binford, 1981 and the results of our experiment regarding the CNA). Adapted according to Masset et al.*  
 742 *2016.*

743

## 744 **Conclusion**

745 For the purposes of testing intuitiveness in bone breakage, we experimentally tested the  
 746 influence of individual behaviour and long bone morphology on percussion mark location. We  
 747 observed a high variability of gestures during the breakage process. Most of the volunteers developed  
 748 their own routine. This routine included several positions and different techniques, involving  
 749 variability in the applied force and different bone element responses. Nevertheless, our results  
 750 highlight similarities in percussion mark distribution despite the specificity of each experimenter, for  
 751 most of the long bones studied here. Indeed, one of the most important results is the identification of  
 752 specific hot spot areas, regardless of the variability of experimenters' behaviour during the breakage  
 753 process. These similarities can be considered as intuitive patterns.

754           The location of percussion marks is influenced by numerous variables depending on: the  
755 experimenters' behaviour and skills, the techniques employed, the location of the blows, the  
756 morphology of the skeletal element and bone position during breakage. Nevertheless, our results  
757 highlighted the predominance of two main factors in an intuitive context: long bone morphology for  
758 the humerus, radio-ulna and tibia and experimenters' behaviour for the femur.

759           From a different perspective, we have shown that bone response can be very different in an  
760 intuitive context, notably for the radio-ulna and the tibia. These differences can be observed at almost  
761 all the different levels of the analysed data: volunteer behaviour or perception, marrow quality and  
762 quantity, number of blows and remains produced and type of percussion marks recorded. These results  
763 highlight the diametrically opposed differences between tibias and radio-ulnas in an intuitive context.

764           Our results shed new light on the importance of gestures in the breakage process. It could  
765 prove interesting to model these results and evaluate their amplitude and the force involved. Numerous  
766 studies focus on the force required to break long bones but generally concentrate on pressure methods.  
767 Consequently, data pertaining to the percussion process are lacking. In addition to measuring the force  
768 applied by the blow, it is essential to evaluate the force of the counter-blow caused by different  
769 materials, such as stone, bone or wood.

770           Percussion marks are very instructive in an archaeological context to access past subsistence  
771 behaviour. Our results show that percussion traces on fossil bones are only the tip of the iceberg. They  
772 only reveal a small window into past bone marrow extraction practices. This experiment highlighted  
773 the variability of volunteers' behaviour and the different bone responses during fracturing in order to  
774 propose new hypotheses on past butchering practices based on the comparison of the different data  
775 analysed in this work.

776           To conclude, the influence of bone morphology on the distribution of percussion marks in the  
777 archaeological record should be taken into account before inferring cultural traditions. It is essential to  
778 compare the intuitive patterns highlighted by spatial analysis with the patterns identified in  
779 archaeological levels. It could also prove interesting in archaeological contexts to carefully consider  
780 percussion mark distribution on the femur as this could be the most instructive bone element, in terms  
781 of marrow recovery methods and group specificity.

782

783 ***Acknowledgements***

784 We express our gratitude to CHARAL S.A.S. who kindly provided all the bones used in the  
785 preparation of this experiment. We are grateful for the funding of the Fondation Nestlé France. Many  
786 thanks to Eric Pellé and Zoé Thalaud of the Service de Préparation Ostéologique et Taxidermique  
787 (SPOT) from the Muséum national d'Histoire naturelle in Paris, for the osteological preparation of all  
788 the long bones. We also wish to thank Laetitia Demay for her precious advice during proofreading and  
789 her valuable help during the experiment. Laurent Crépin and colleagues provided helping logistical  
790 advice and assistance during the experiment. We are deeply grateful to the volunteers for their selfless  
791 efforts in helping with our experiment. We also thank Lou Albessard, Jeremy Duveau and Guilhem  
792 Mauran for their precious advice. L. Byrne, an official translator and native English speaker, edited the  
793 English manuscript.

794

795 ***Financial Disclosure***

796 This project was supported by the Fondation Nestlé France (SJ 671-16) (<https://fondation.nestle.fr/>);  
797 the Centre d'Information des Viandes – Viande, sciences et société (SJ 334-17); the Muséum national  
798 d'Histoire naturelle.

799

800 ***Disclosure statement***

801 No potential conflict of interest was reported by the authors.

802

803 **References**

- 804 Abe, Y., 2005. Hunting and Butchery Patterns of the Evenki in Northern Transbaikalia, Russia. Stony  
805 brook University.
- 806 Alhaique, F., 1997. DO PATTERNS OF BONE BREAKAGE DIFFER BETWEEN COOKED AND UNCOOKED  
807 BONES? AN EXPERIMENTAL APPROACH. *Anthropozoologica* 25–26, 49–56.
- 808 Benazzi, S., Blasco, R., Fiorenza, L., Benazzi, S., Henry, A.G., Salazar-garc, D.C., 2015. To Meat or Not  
809 to Meat? New Perspectives on Neanderthal Ecology. *Yearb. Phys. Anthropol.* 156, 43–71.  
810 <https://doi.org/10.1002/ajpa.22659>
- 811 Binford, L.R., 1981. *Bones: Ancient Men and Modern Myths.*, Academic P. ed. New-York.
- 812 Binford, L.R., 1978. *Nunamiut: Ethnoarchaeology*, Academic P. ed. New-York, Chicago, London.
- 813 Blasco, R., Domínguez-Rodrigo, M., Arilla, M., Camarós, E., Rosell, J., 2014. Breaking Bones to Obtain  
814 Marrow: A Comparative Study between Percussion by Batting Bone on an Anvil and Hammerstone  
815 Percussion. *Archaeometry* 56, 1085–1104. <https://doi.org/10.1111/arcm.12084>
- 816 Blasco, R., Fernández Peris, J., 2012. Small and large game: Human use of diverse faunal resources at  
817 Level IV of Bolomor Cave (Valencia, Spain). *Comptes Rendus - Palevol* 11, 265–282.  
818 <https://doi.org/10.1016/j.crpv.2012.01.003>
- 819 Blasco, R., Rosell, J., Domínguez-Rodrigo, M., Lozano, S., Pastó, I., Riba, D., Vaquero, M., Peris, J.F.,  
820 Arsuaga, J.L., de Castro, J.M.B., Carbonell, E., 2013. Learning by Heart: Cultural Patterns in the Faunal  
821 Processing Sequence during the Middle Pleistocene. *PLoS One* 8, e55863.  
822 <https://doi.org/10.1371/journal.pone.0055863>
- 823 Blumenschine, R.J., Selvaggio, M.M., 1988. Percussion marks on bone surfaces as a new diagnostic of  
824 hominid behaviour. *Nature* 333, 763–765.
- 825 Brugal, J.P., Defleur, A., 1989. Approche expérimentale de la fracturation des os des membres de  
826 grands mammifère. *Artefacts* 7, 14–20.
- 827 Capaldo, S.D., Blumenschine, R.J., 1994. A Quantitative Diagnosis of Notches Made by Hammerstone  
828 Percussion and Carnivore Gnawing on Bovid Long Bones. *Am. Antiq.* 59, 724–748.
- 829 Castel, J.C., 1999. Castel, J. C. (1999). Comportements de subsistance au Solutréen et au Badegoulien  
830 d’après les faunes de Combe Saunière (Dordogne) et du Cuzoul de Vers (Lot). Université Bordeaux I.
- 831 Costamagno, S., 1999. Stratégies de Chasse et Fonction des Sites au Magdalénien dans le Sud de la  
832 France. Université Bordeaux I.
- 833 Costamagno, S., David, F., 2009. Comparaison des pratiques bouchères et culinaires de différents  
834 groupes sibériens vivant de la renniculture. *Archaeofauna* 18, 9–25.
- 835 Costamagno, S., Rigaud, J.-P., 2014. L’exploitation de la graisse au Paléolithique. *Hist. l’alimentation*  
836 *Hum. entre choix contraintes* 134–152.
- 837 Daujeard, C., Fernandes, P., Guadelli, J.L., Moncel, M.H., Santagata, C., Raynal, J.P., 2012.  
838 Neanderthal subsistence strategies in Southeastern France between the plains of the Rhone Valley  
839 and the mid-mountains of the Massif Central (MIS 7 to MIS 3). *Quat. Int.* 252, 32–47.  
840 <https://doi.org/10.1016/j.quaint.2011.01.047>
- 841 Daujeard, C., Vettese, D., Britton, K., Béarez, P., Boulbes, N., Crégut-Bonnoure, E., Desclaux, E.,  
842 Lateur, N., Pike-Tay, A., Rivals, F., Allué, E., Chacón, M.G., Puaud, S., Richard, M., Courty, M.-A.,  
843 Gallotti, R., Hardy, B., Bahain, J.J., Falguères, C., Pons-Branchu, E., Valladas, H., Moncel, M.-H., 2017.

- 844 Neanderthal selective hunting of reindeer? The case study of Abri du Maras (south-eastern France).  
845 *Archaeol. Anthropol. Sci.* 1–27. <https://doi.org/10.1007/s12520-017-0580-8>
- 846 De la Torre, I., Benito-calvo, A., Arroyo, A., Zupancich, A., Proffitt, T., 2013. Experimental protocols for  
847 the study of battered stone anvils from Olduvai Gorge. *J. Archaeol. Sci.* 40, 313–332.  
848 <https://doi.org/10.1016/j.jas.2012.08.007>
- 849 Domínguez-Rodrigo, M., Pickering, T.R., Bunn, H.T., 2010. Configurational approach to identifying the  
850 earliest hominin butchers. *Proc. Natl. Acad. Sci.* 1–6. <https://doi.org/10.1073/pnas.1013711107>
- 851 Enloe, J.G., 1993. Ethnoarchaeology of marrow cracking: implications for the recognition of  
852 prehistoric subsistence organization., in: Hudson, J. (Ed.), *From Bones to Behavior: Ethnoarchaeological and Experimental Contributions to the Interpretation of Faunal Remains*. Southern Illinois University, Carbondale, pp. 82–100.
- 855 Galán, B., Rodríguez, M., de Juana, S., Domínguez-Rodrigo, M., 2009. A new experimental study on  
856 percussion marks and notches and their bearing on the interpretation of hammerstone-broken  
857 faunal assemblages. *J. Archaeol. Sci.* 36, 776–784. <https://doi.org/10.1016/j.jas.2008.11.003>
- 858 Hardy, K., Brand-miller, J., Brown, K.D., Thomas, M.G., Copeland, L., 2006. The Importance of Dietary  
859 Carbohydrate in Human Evolution. *Quaterly Rev. Biol.* 90 (3), 251–268.
- 860 Holt, S.H., Eaton, S.B., Miller, J.B., Cordain, L., Speth, J.D., Mann, N., 2018. Plant-animal subsistence  
861 ratios and macronutrient energy estimations in worldwide hunter-gatherer diets. *Am. J. Clin. Nutr.*  
862 71, 682–692. <https://doi.org/10.1093/ajcn/71.3.682>
- 863 Joana, M., Cáceres, I., Rosell, J., Saladié, P., Vallverdú, J., 2014. From small bone fragments to  
864 Neanderthal activity areas: The case of Level O of the Abric Romaní ( Capellades , Barcelona , Spain  
865 ). *Quat. Int.* 330, 36–51. <https://doi.org/10.1016/j.quaint.2013.12.015>
- 866 Jones, K.T., Metcalfe, D., 1988. Bare bones archaeology: Bone marrow indices and efficiency. *J.*  
867 *Archaeol. Sci.* 15, 415–423. [https://doi.org/10.1016/0305-4403\(88\)90039-8](https://doi.org/10.1016/0305-4403(88)90039-8)
- 868 Karr, L.P., Outram, A.K., 2012. Tracking changes in bone fracture morphology over time: environment , taphonomy , and the archaeological record. *J. Archaeol. Sci.* 39, 555–559.  
870 <https://doi.org/10.1016/j.jas.2011.10.016>
- 871 Kuntz, D., Costamagno, S., Feyfant, L., Martin, F., 2016. The exploitation of ungulates in the  
872 Magdalenian in the Entre-Deux-Mers (Gironde, France). *Quat. Int.* 414, 135–158.  
873 <https://doi.org/10.1016/j.quaint.2015.12.079>
- 874 Lacroix, M.N., 2011. *A Study of the Impact of Weathering Upon the Minimal Force Required To Fracture Bone*. Boston.
- 876 Lam, Y.M., Chen, X., Pearson, O.M., 1999. Intertaxonomic Variability in Patterns of Bone Density and  
877 the Differential Representation of Bovid , Cervid , and Equid Elements in the Archaeological Record. *Soc. Am. Archaeol.* 64, 343–362. <https://doi.org/10.2307/2694204>
- 879 Lyman, L.R., 1994. *Vertebrate Taphonomy*. Cambridge University Press, Cambridge.
- 880 Marín, J., Saladié, P., Rodríguez-Hidalgo, A., Carbonell, E., 2017. Neanderthal hunting strategies  
881 inferred from mortality profiles within the Abric Romaní sequence, *Plos One*.  
882 <https://doi.org/10.1371/journal.pone.0186970>
- 883 Martin, H., 1910. La Percussion osseuse et les esquilles qui en dérivent . *Expérimentation. Bull. la Soc.*  
884 *Prehist. Fr.* 5, 299–304.
- 885 Masset, C., Costamagno, S., Cochard, D., Laroulandie, V., 2016. La fracturation osseuse: du fait

- 886 technique à l'essai d'interprétation sociétale L'exemple de l'antilope saïga du gisement  
887 magadelenien de Saint-Germain -la-Rivière (Gironde). Bull. la Société préhistorique française 113,  
888 691–712.
- 889 Moclán, A., Domínguez-Rodrigo, M., 2018. An experimental study of the patterned nature of  
890 anthropogenic bone breakage and its impact on bone surface modification frequencies. *J. Archaeol.*  
891 *Sci.* 96, 1–13. <https://doi.org/10.1016/j.jas.2018.05.007>
- 892 Noe-Nygaard, N., 1977. Butchering and Marrow Fracturing as a Taphonomic Factor in Archaeological.  
893 *Paleontol. Soc.* 3, 218–237.
- 894 O'Connell, J.F., Hawkes, K., Blurton-Jones, N.G., 1992. Patterns in the distribution, site structure and  
895 assemblage composition of Hadza kill-butcher sites. *J. Archaeol. Sci.* 19, 319–345.  
896 [https://doi.org/10.1016/0305-4403\(92\)90020-4](https://doi.org/10.1016/0305-4403(92)90020-4)
- 897 Oliver, J.S., 1993. Carcass processing by the Hadza: bone breakage from butchery to consumption, in:  
898 Hudson, J. (Ed.), *From Bones to Behavior: Ethnoarchaeological and Experimental Contributions to the*  
899 *Interpretation of Faunal Remains.* Occasional Paper No. Center for Archaeological Investigations,  
900 Southern Illinois University, Carbondale, pp. 200–227.
- 901 Outram, A.K., 2002. Bone Fracture and Within-bone Nutrients: an Experimentally Based Method for  
902 Investigating Levels of Marrow Extraction, in: Miracle, P., Milner, N. (Eds.), *Consuming Passions and*  
903 *Patterns of Consumption.* Cambridge.
- 904 Patou-Mathis, M., 2000. La chasse chez les! Kung: San du Nord-Ouest du Kalahari, Botswana.  
905 *Anthropol. préhistoire* 111, 344–354.
- 906 Patou-Mathis, M., 1985. La fracturation des os longs de mammifères: élaboration d'un lexique et  
907 d'une fiche type. *Artefacts* 1, 11–22.
- 908 Pickering, T.R., Egeland, C.P., 2006. Experimental patterns of hammerstone percussion damage on  
909 bones: Implications for inferences of carcass processing by humans. *J. Archaeol. Sci.* 33, 459–469.  
910 <https://doi.org/10.1016/j.jas.2005.09.001>
- 911 R Core Team, 2019. R: A language and environment for statistical computing. [WWW Document].  
912 *Found. Stat. Comput.* Vienna, Austria.
- 913 Romandini, M., Nannini, N., Tagliacozzo, A., Peresani, M., 2014. The ungulate assemblage from layer  
914 A9 at Grotta di Fumane, Italy: A zooarchaeological contribution to the reconstruction of Neanderthal  
915 ecology. *Quat. Int.* 337, 11–27. <https://doi.org/10.1016/j.quaint.2014.03.027>
- 916 Rovira Formento, M., 2010. Aproximación experimental a la explotación de huesos largos de grandes  
917 animales para la recuperación de la médula ósea y su aplicación arqueológica al registro faunístico  
918 del Nivel 3 colluvio de Isernia La Pineta (Molise , Italia). *Arqueologia del Quaternari i Evolució*  
919 *Humana.*
- 920 Speth, J.D., 2010. *The Paleoanthropology and Archaeology of Big-Game Hunting Protein, Fat, or*  
921 *Politics?*, Springer. ed.
- 922 Speth, J.D., 1989. Early hominid hunting and scavenging: the role of meat as an energy source. *J.*  
923 *Hum. Evol.* 18, 329–343. [https://doi.org/10.1016/0047-2484\(89\)90035-3](https://doi.org/10.1016/0047-2484(89)90035-3)
- 924 Speth, J.D., Meignen, L., Bar-Yosef, O., Goldberg, P., 2012. Spatial organization of Middle Paleolithic  
925 occupation X in Kebara Cave (Israel): Concentrations of animal bones. *Quat. Int.* 247, 85–102.  
926 <https://doi.org/10.1016/j.quaint.2011.03.001>
- 927 Speth, J.D., Spielman, K.A., 1983. Energy source, protein metabolism, and hunter-gatherer  
928 subsistence strategies. *J. Anthropol. Archaeol.* 2 (1), 1–31.



- 929 Stiner, M.C., Gopher, A., Barkai, R., 2011. Hearth-side socioeconomics, hunting and paleoecology  
930 during the late Lower Paleolithic at Qesem Cave, Israel. *J. Hum. Evol.* 60, 213–233.  
931 <https://doi.org/10.1016/j.jhevol.2010.10.006>
- 932 Thiébaud, C., Claud, É., Coudenneau, A., Coumont, M.-P., Asselin, G., Beauval, C., Chacón, G.,  
933 Sandrine, C., Daulny, L., Gerbe, M., Mallye, J.-B., Maury, S., Mourre, V., Plisson, H., Provenzano, N.,  
934 Streit, L., 2007. Des traces et des Hommes.
- 935 Valensi, P., Michel, V., El Guenouni, K., Liouville, M., 2013. New data on human behavior from a 160 ,  
936 000 year old Acheulean occupation level at Lazaret cave , south-east France: An archaeozoological  
937 approach. *Quat. Int.* 316, 123–139. <https://doi.org/10.1016/j.quaint.2013.10.034>
- 938 Vettese, D., 2020. An archaeological experiment focused on the intuitive way of long bones breakage  
939 to extract marrow. **protocols.io**  
940 [dx.doi.org/10.17504/protocols.io.bb6airae](https://doi.org/10.17504/protocols.io.bb6airae)
- 941 Vettese, D., Daujeard, C., Blasco, R., Borel, A., Caceres, I., Moncel, M.H., 2017. Neandertal long bone  
942 breakage process: Standardized or random patterns? The example of Abri du Maras ( Southeastern  
943 France , MIS 3 ). *J. Archaeol. Sci. Reports* 13, 151–163. <https://doi.org/10.1016/j.jasrep.2017.03.029>
- 944 Villa, P., Mahieu, E., 1991. Breakage pattern of human long bones. *J. Hum. Evol.* 21, 27–48.
- 945 Yravedra, J., Maté-González, M.Á., Palomeque-González, J.F., Aramendi, J., Estaca-Gómez, V., San  
946 Juan Blazquez, M., García Vargas, E., Organista, E., González-Aguilera, D., Arriaza, M.C., Cobo-  
947 Sánchez, L., Gidna, A., Uribealrrea Del Val, D., Baquedano, E., Mabulla, A., Domínguez-Rodrigo, M.,  
948 2017. A new approach to raw material use in the exploitation of animal carcasses at BK (Upper Bed II,  
949 Olduvai Gorge, Tanzania): a micro-photogrammetric and geometric morphometric analysis of fossil  
950 cut marks. *Boreas*. <https://doi.org/10.1111/bor.12224>
- 951
